# Supplementary material for: Gallic acid-based dendrimers with a thiacalix[4]arene core: synthesis, aggregation and use for stabilization of Pd nanoparticles
Source: Royal Society of Chemistry journal article supplement (doi:10.1039/d3nj03403h), 2023-01-01
Supplement: d3nj03403h1.pdf [file d3nj03403h1.pdf]

GALLIC ACID-BASED DENDRIMERS WITH THIACALIX[4]ARENE CORE: SYNTHESIS,  
AGGREGATION AND USE FOR Pd NP's STABILIZATION

Aigul M. Fatykhova 1, Elsa D. Sultanova 1, Vladimir A. Burilov 1, Bulat Kh. Gafiatullin 1,  
Angelina A. Fedoseeva 1, Tatyana A. Veshta 1, Marat A. Ziganshin 1, Sufia A. Ziganshina 1,  
Vladimir G. Evtugin 2, Daut R. Islamov 3, Konstantin S. Usachev 3, Svetlana E. Solovieva,4,  
Igor S. Antipin 1

1 Alexander Butlerov Institute of Chemistry, Kazan Federal University, 18 Kremlevskaya Str.,  
420008 Kazan, Russia

2 Interdisciplinary Center for Analytical Microscopy, Kazan Federal University, 18  
Kremlevskaya Str., 420008 Kazan, Russia

3 Laboratory for Structural Studies of Biomacromolecules, FRC Kazan Scientific Center of  
RAS, 2/31 Lobachevskogo Str., 420111 Kazan, Russia

4 Arbuzov Institute of Organic and Physical Chemistry, FRC Kazan Scientific Center of RAS, 8  
Arbuzov Str., 420088 Kazan, Russia

(a)

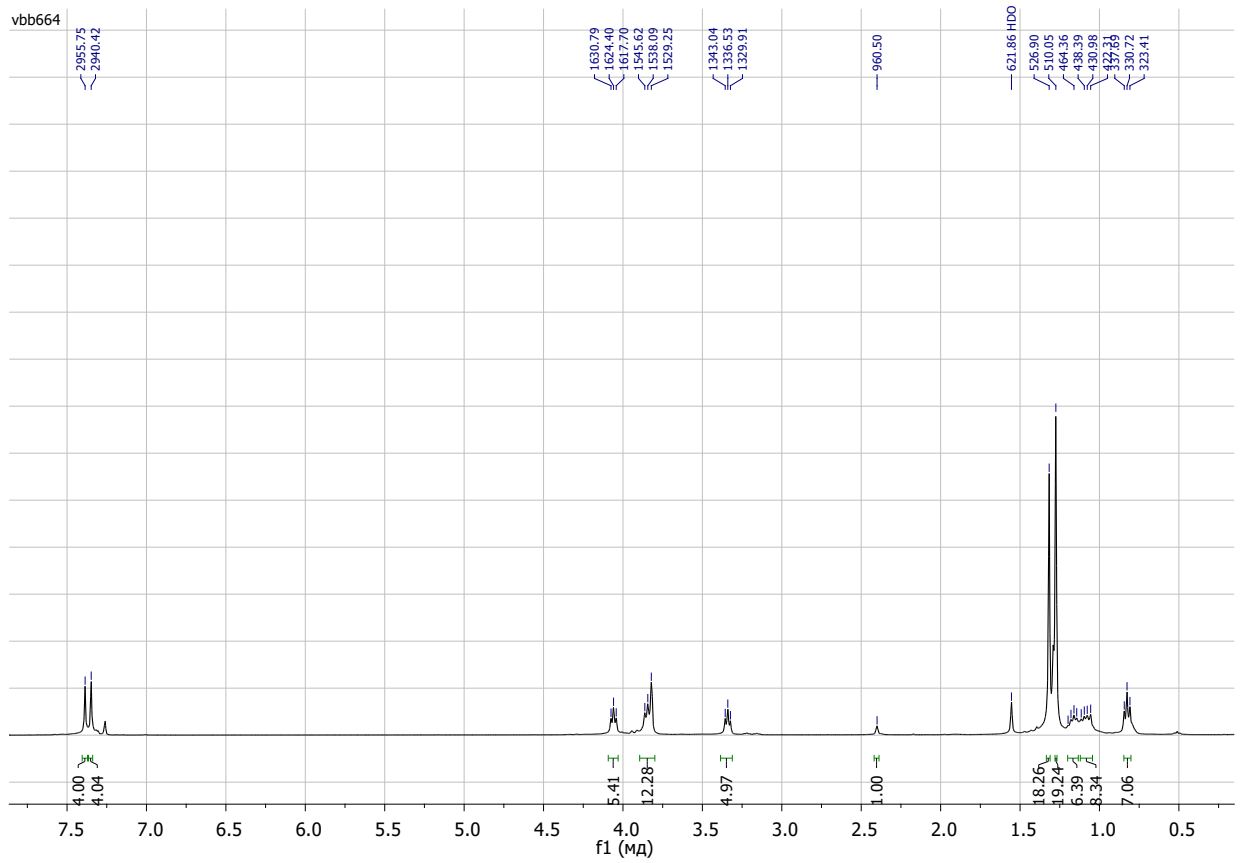

(b)

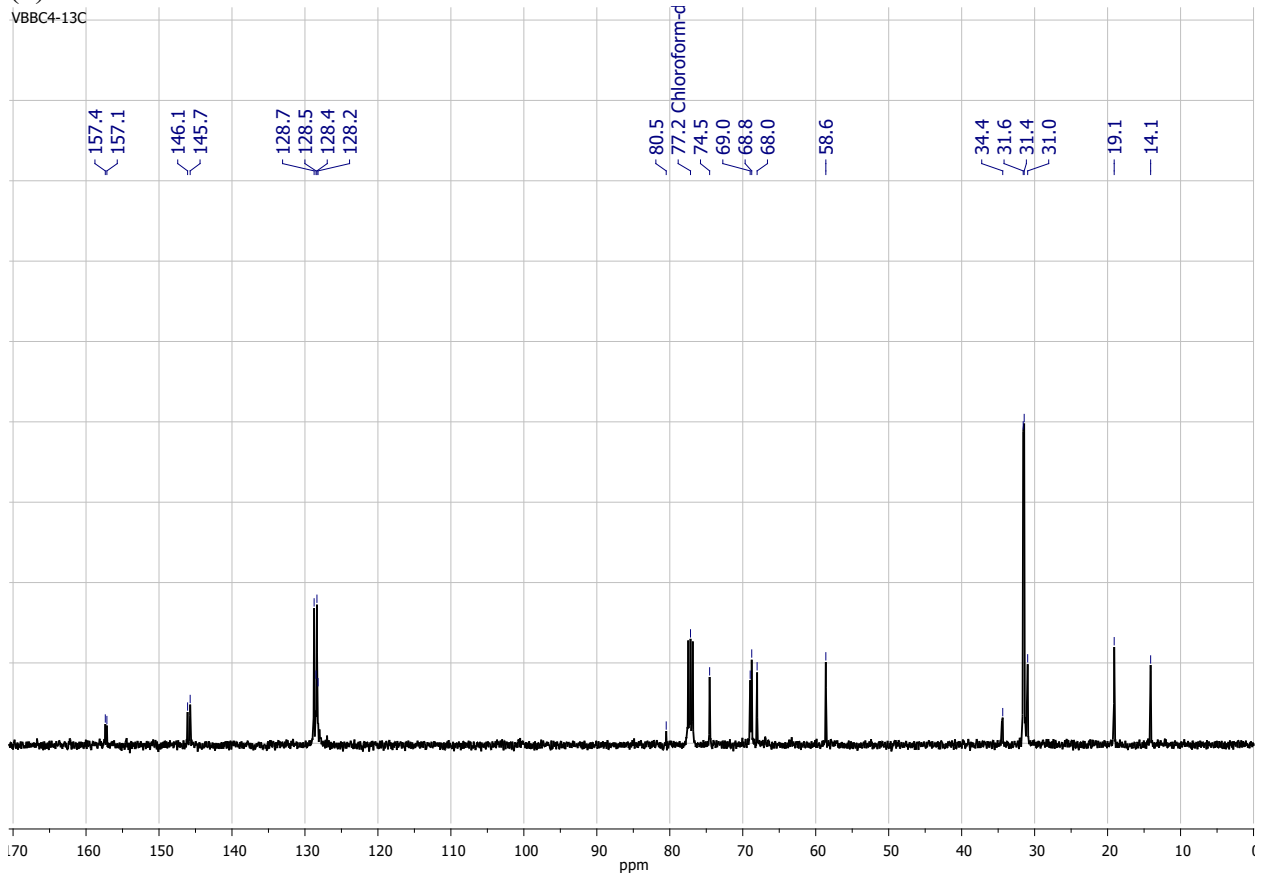

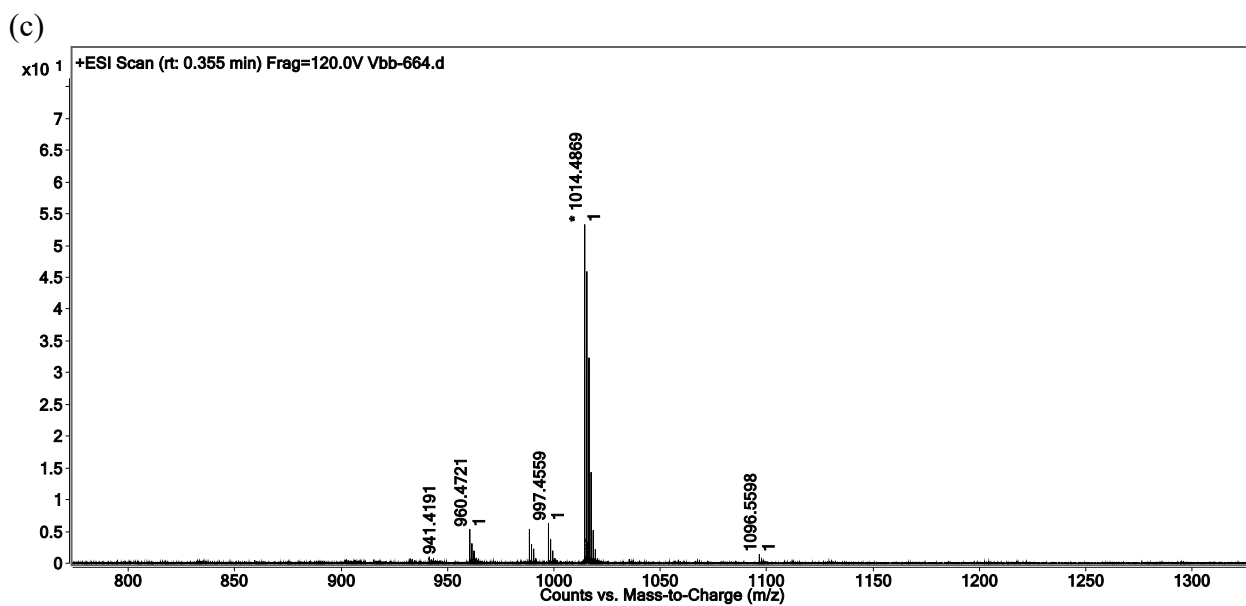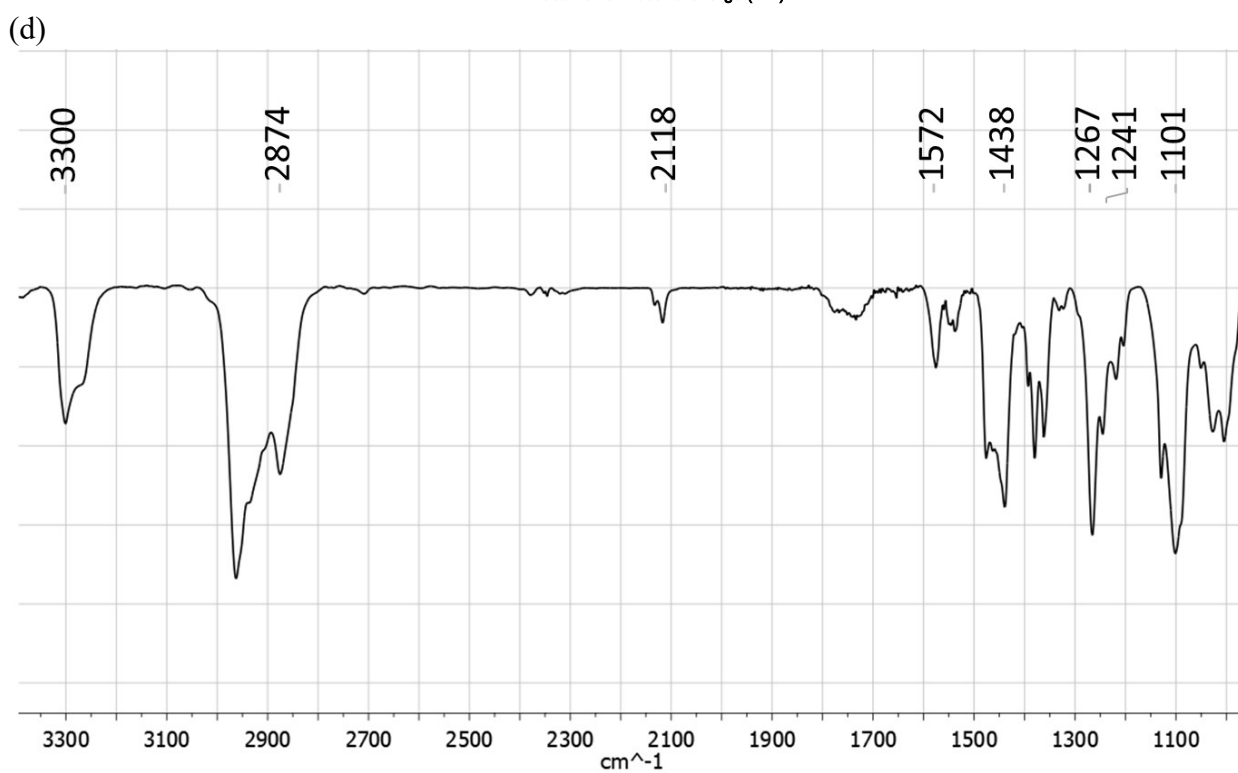

Figure S1. NMR <sup>1</sup>H (a), <sup>13</sup>C (b), and HRESI MS (c), FT IR (d) spectra of *compound (4)*.

(a)

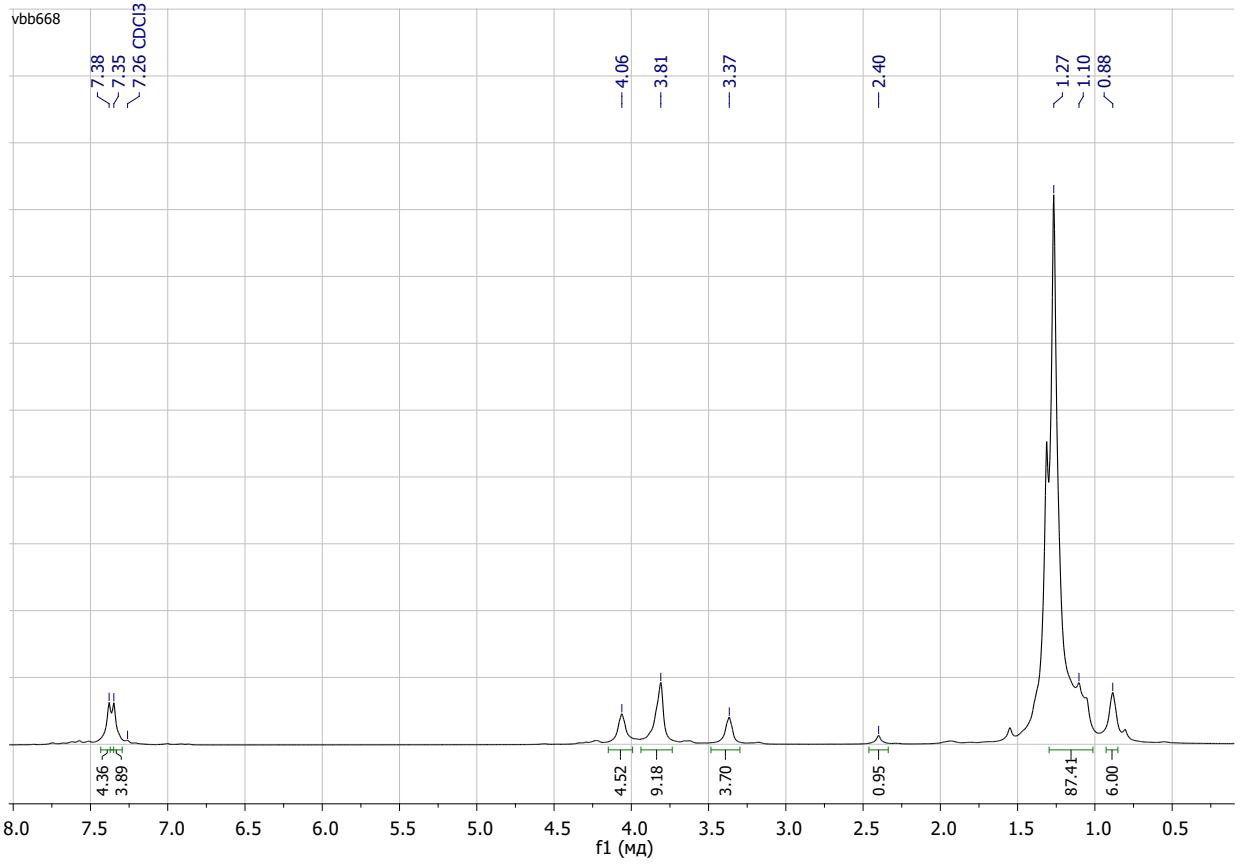

(b)

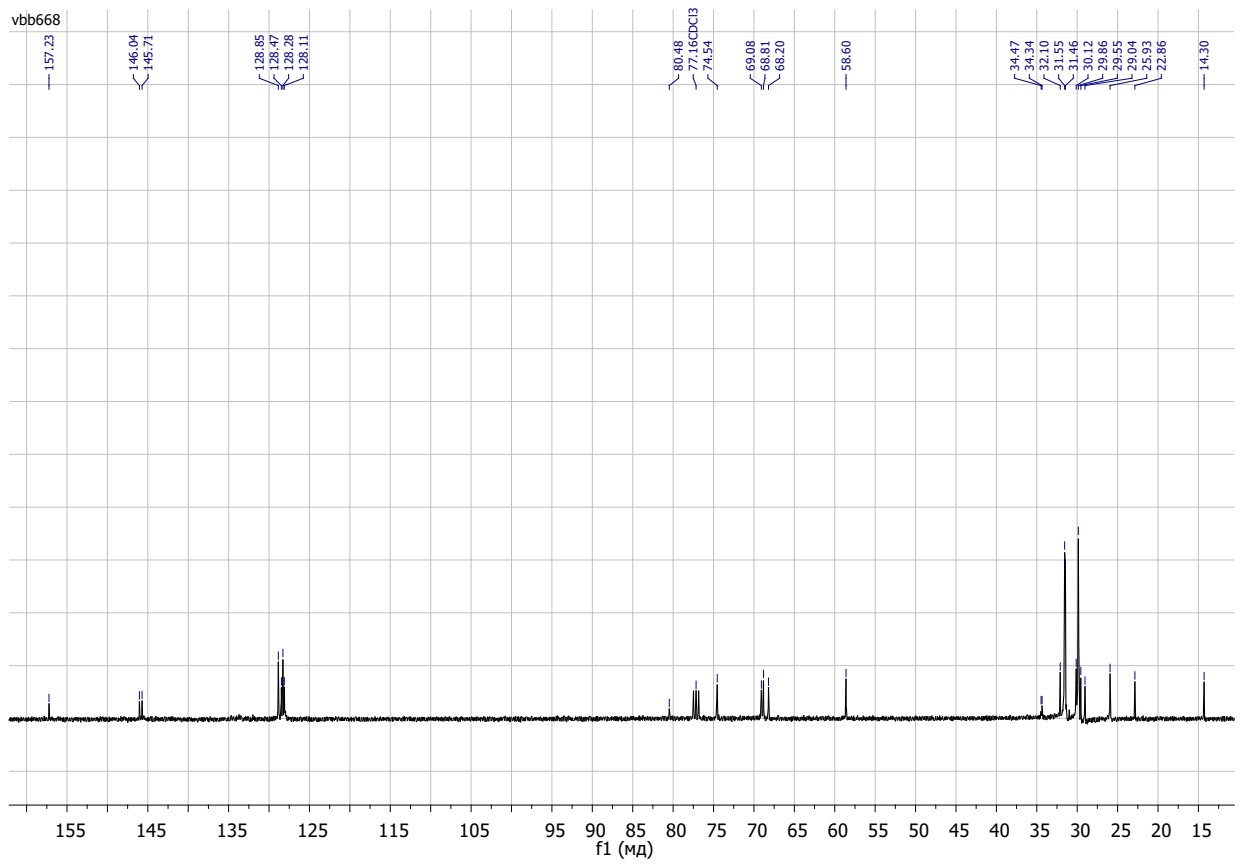

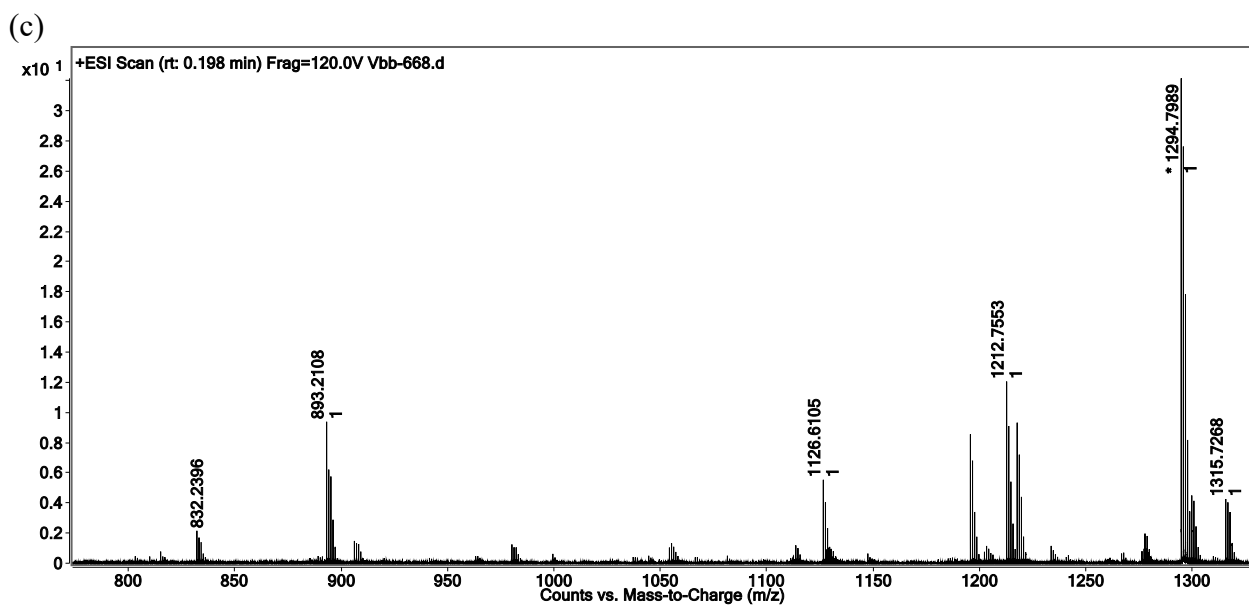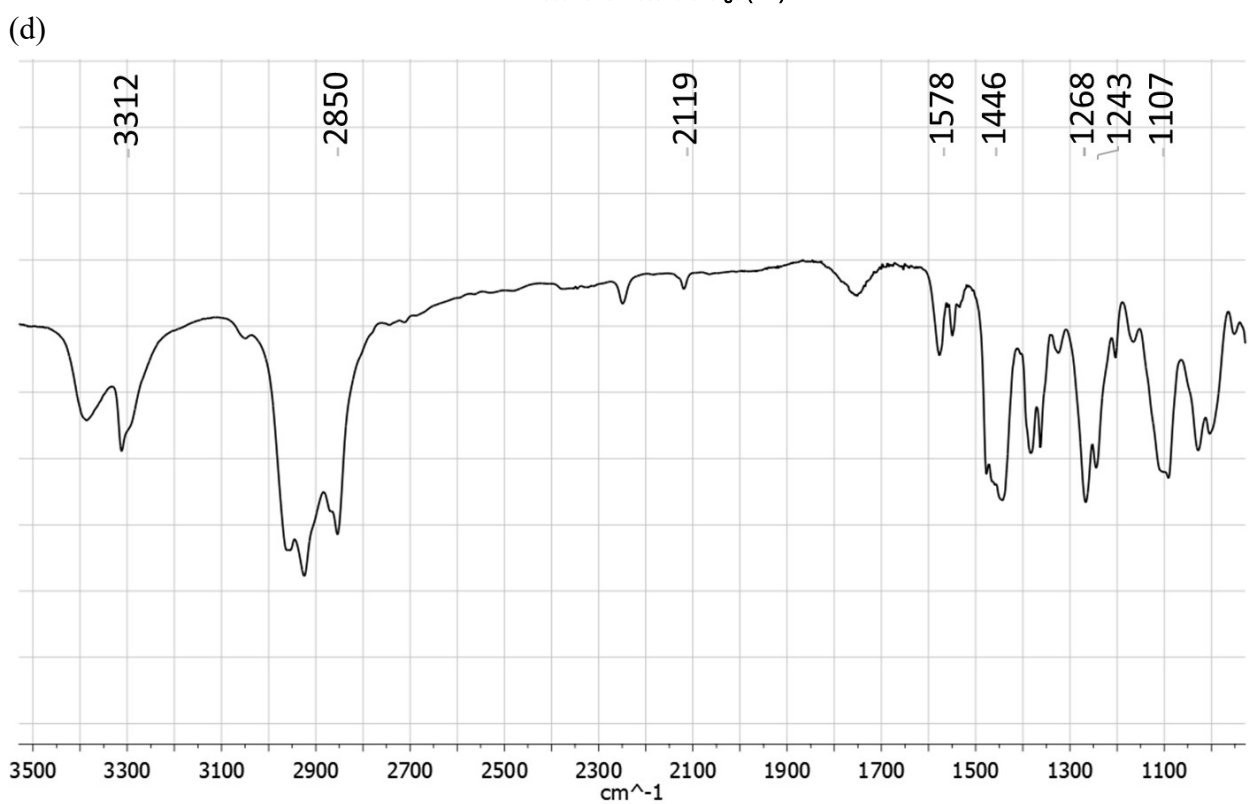

Figure S2. NMR <sup>1</sup>H (a), <sup>13</sup>C (b), and HRESI MS (c), FT IR (d) spectra of *compound (5)*.

(a)

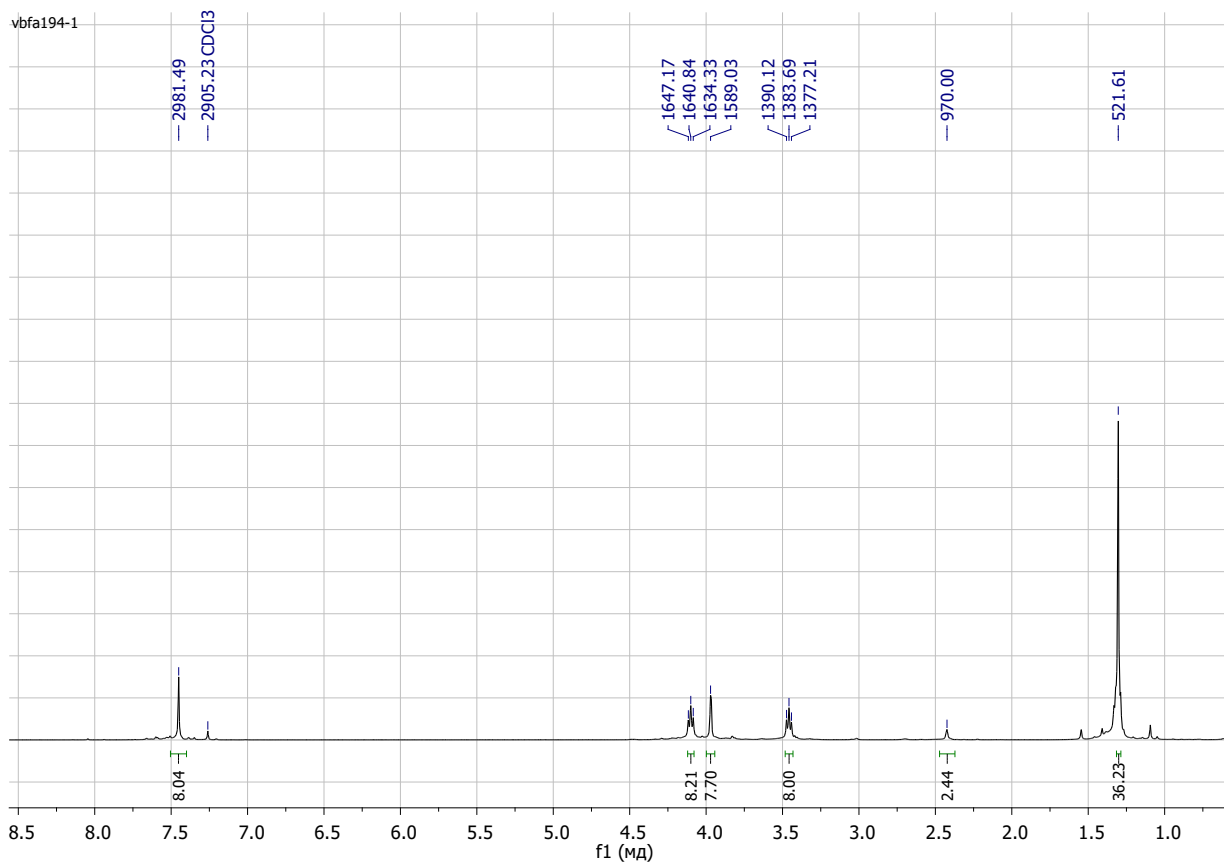

(b)

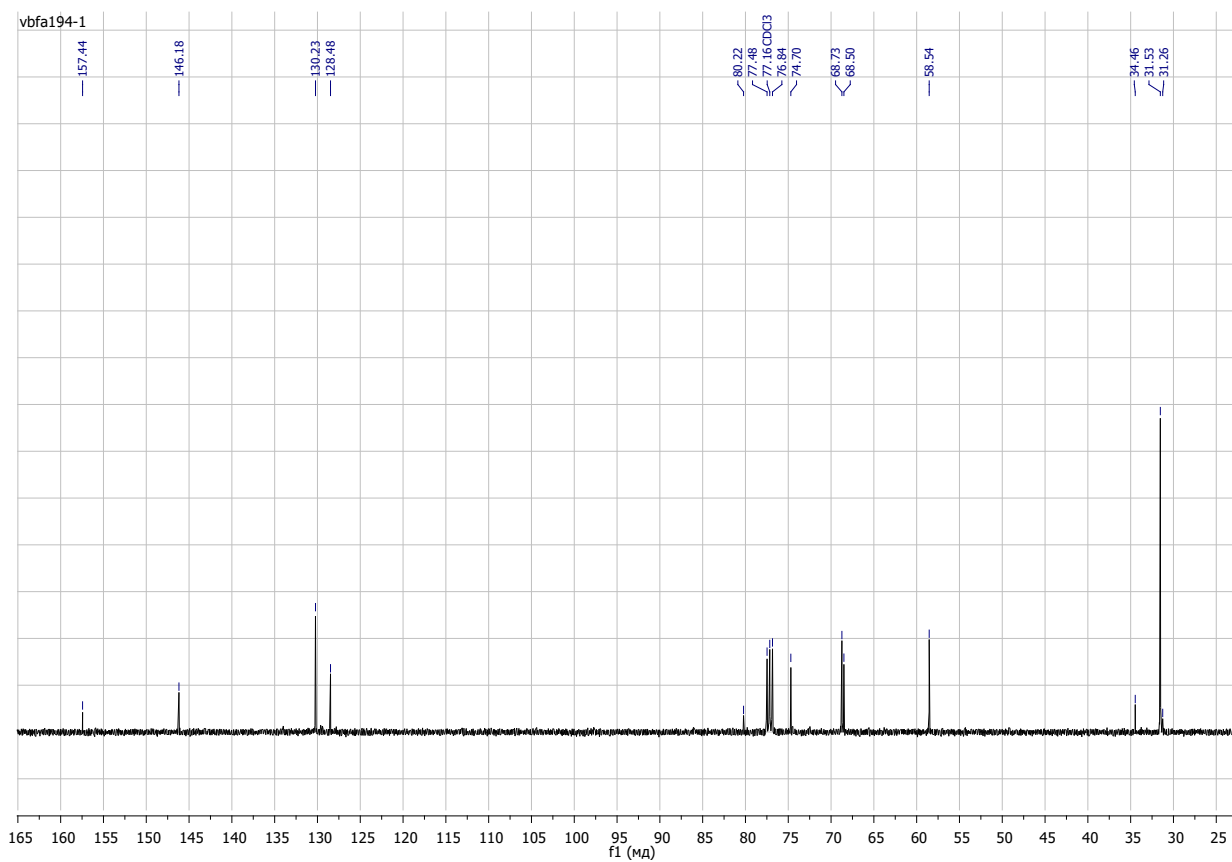

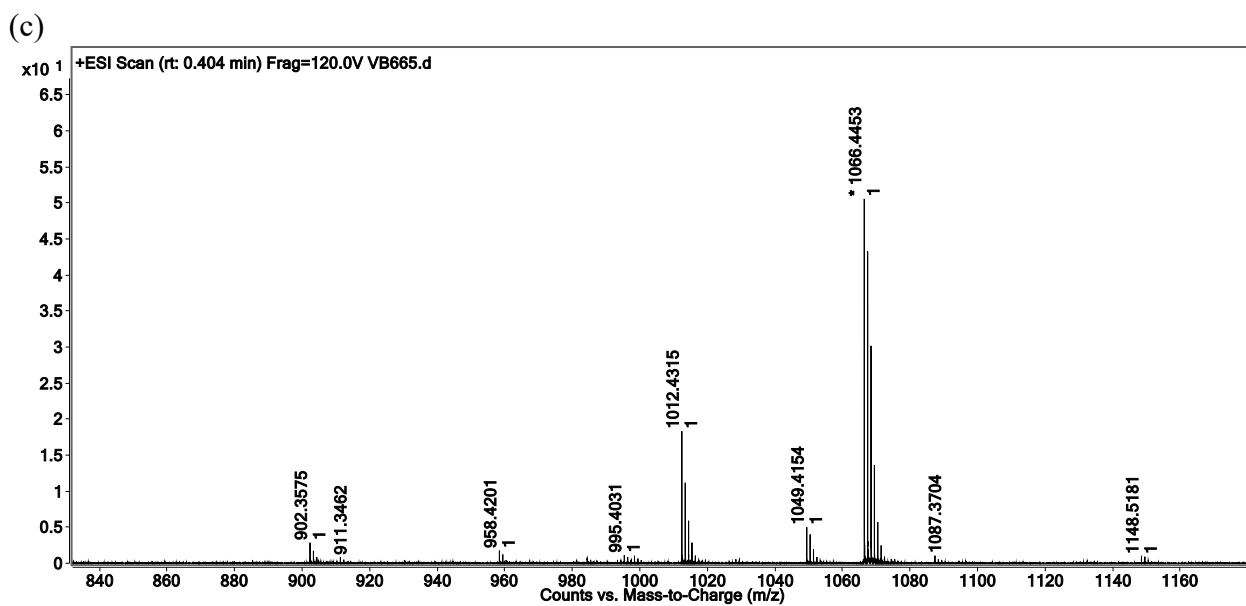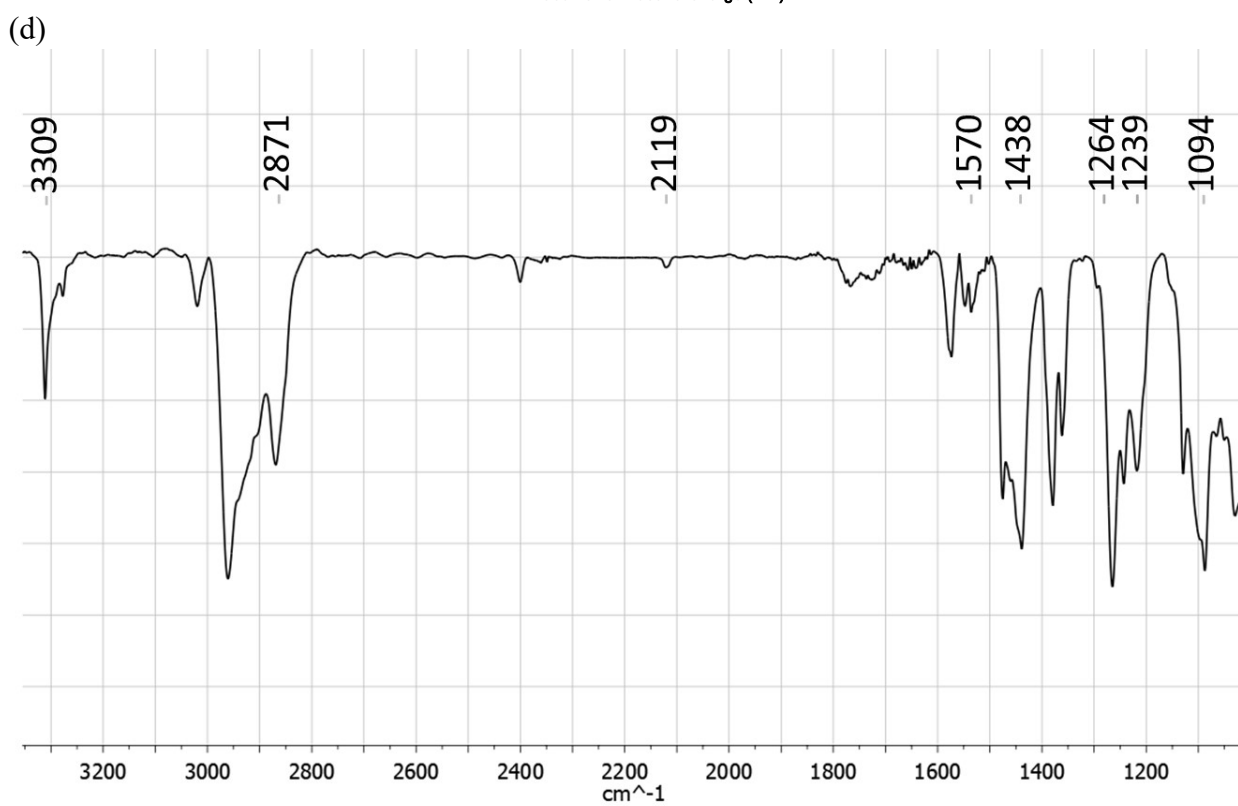

Figure S3. NMR <sup>1</sup>H (a), <sup>13</sup>C (b), and HRESI MS (c), FT IR (d) spectra of *compound (6)*.

(a)

vbfa246-5.1.fid

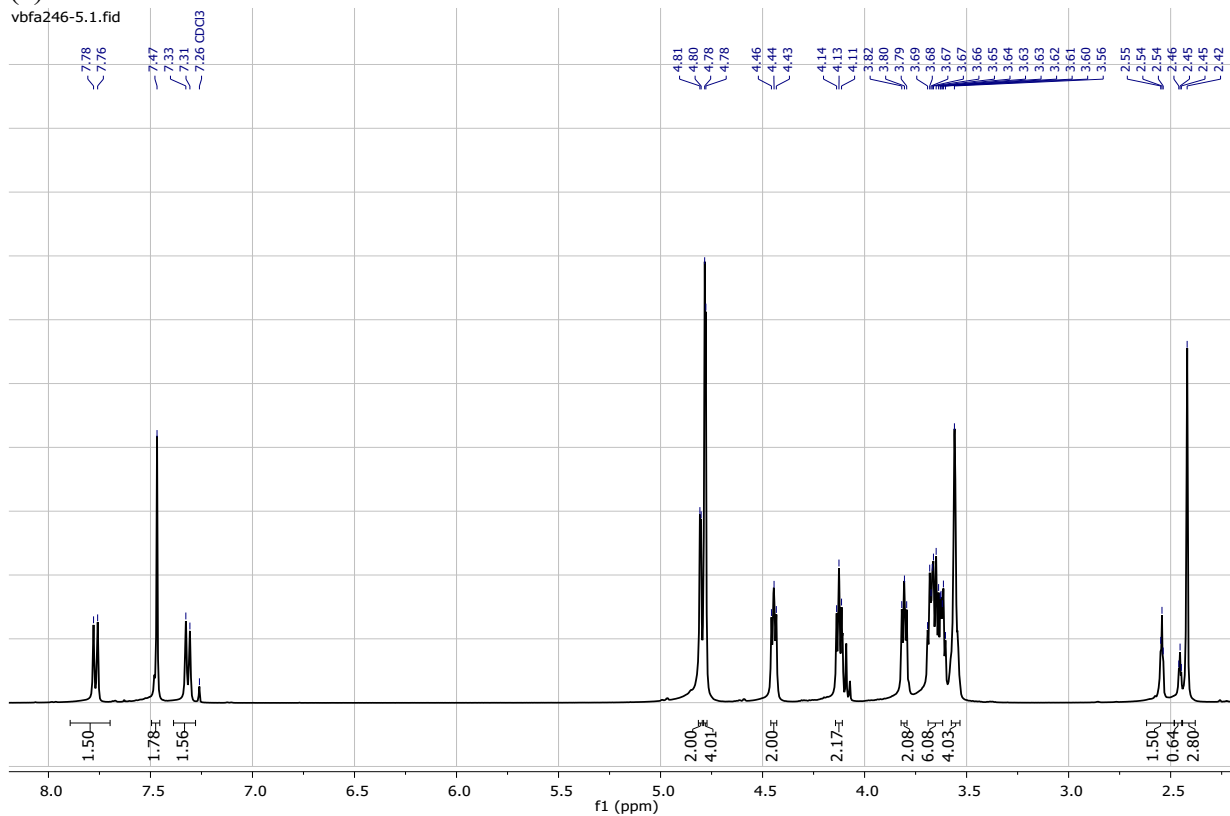

(b)

vbfa246-5C13.1.fid

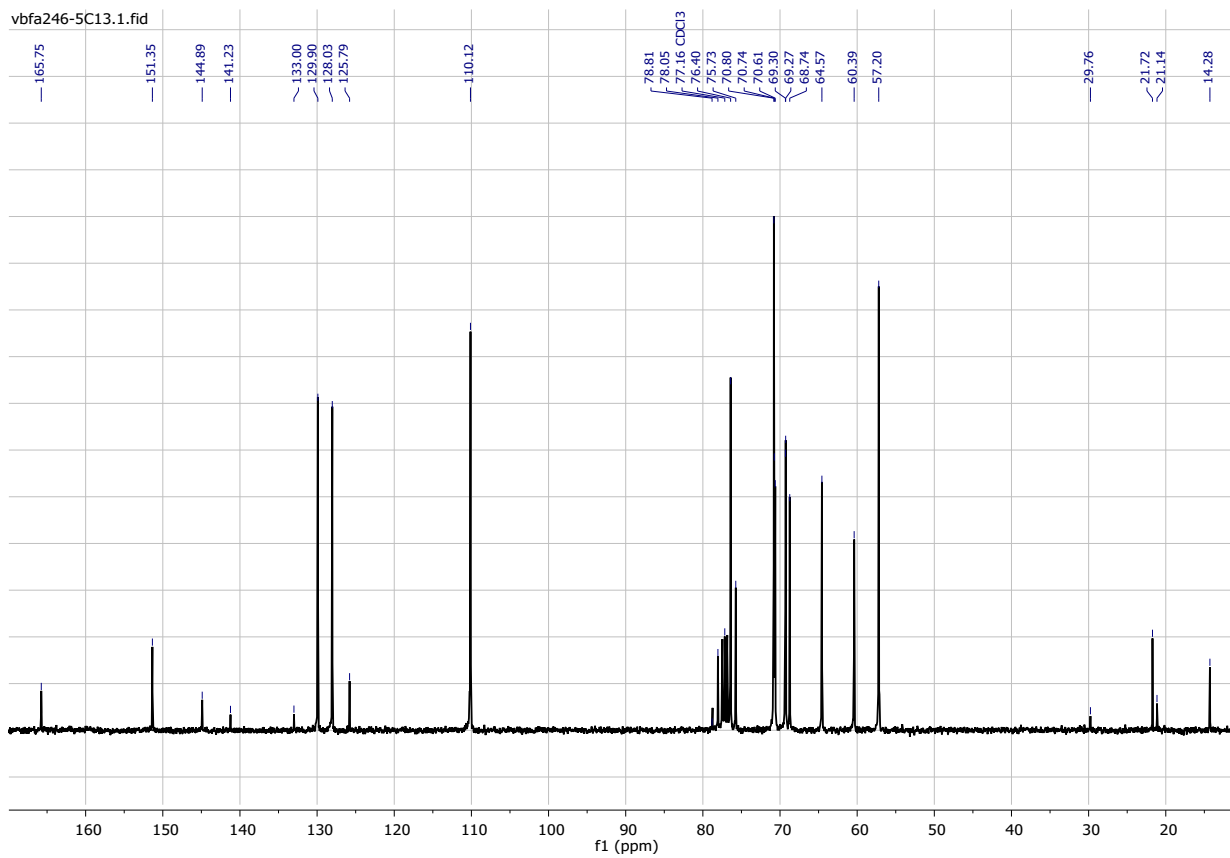



(c)

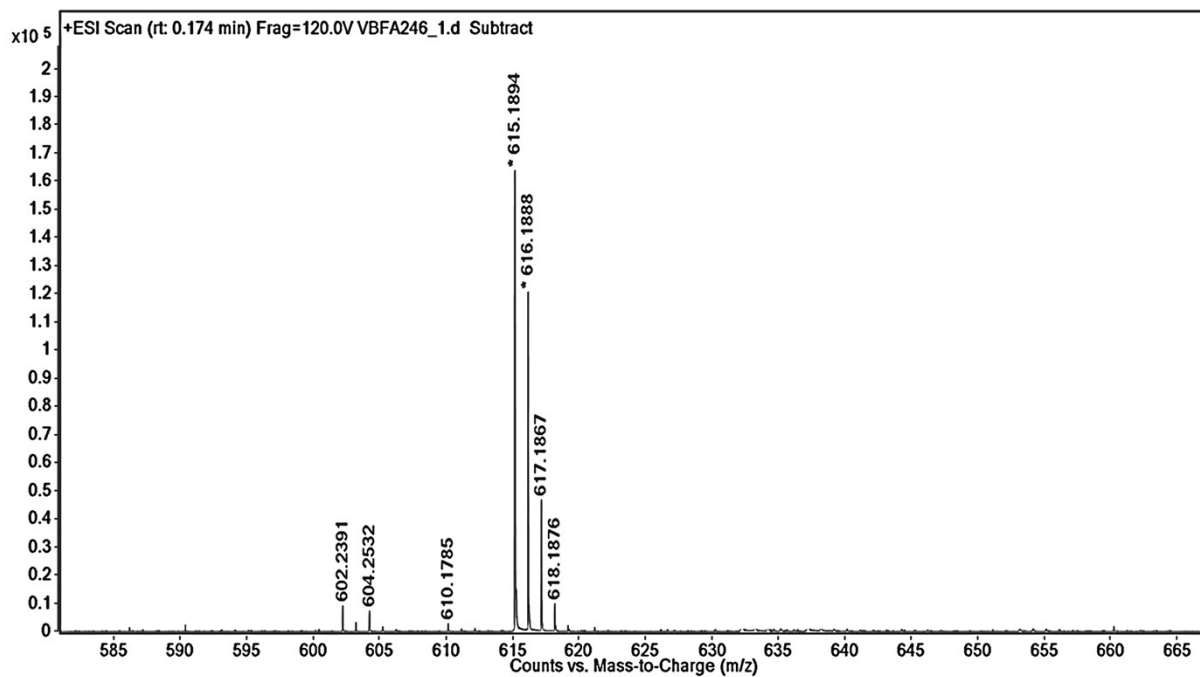

(d)

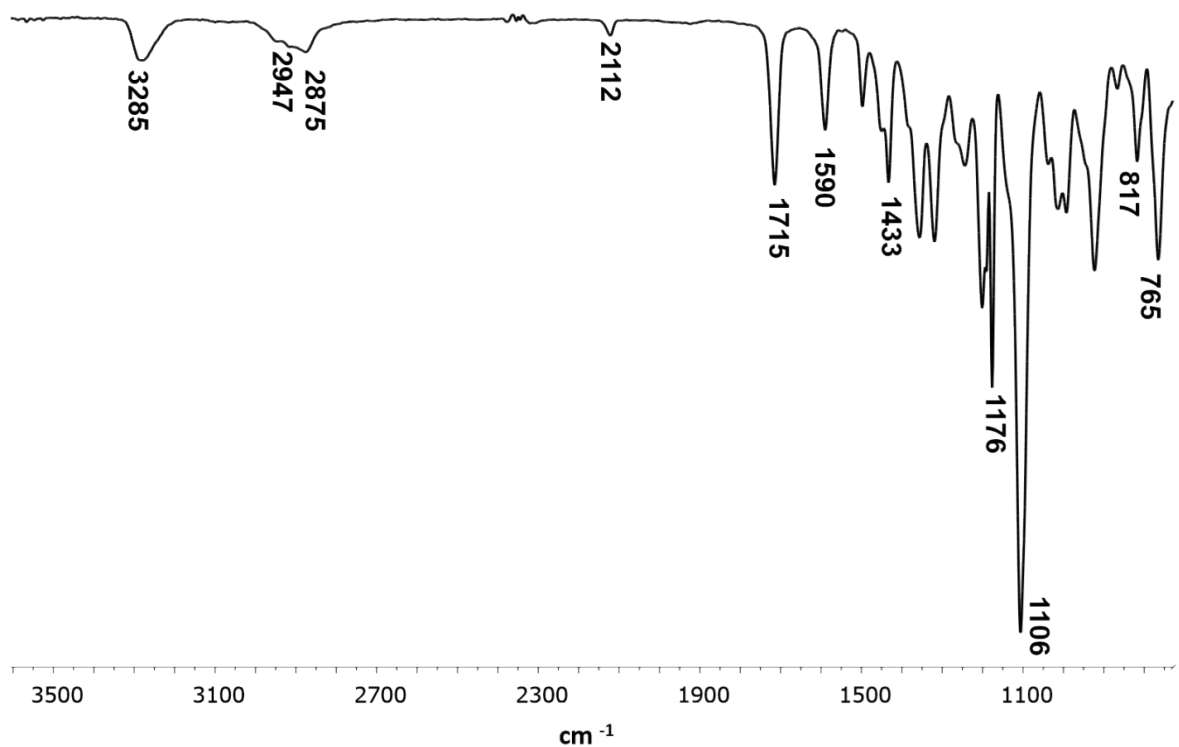

Figure S4. NMR <sup>1</sup>H (a), <sup>13</sup>C (b), and HRESI MS (c), FT IR (d) spectra of *compound (12)*

(a)

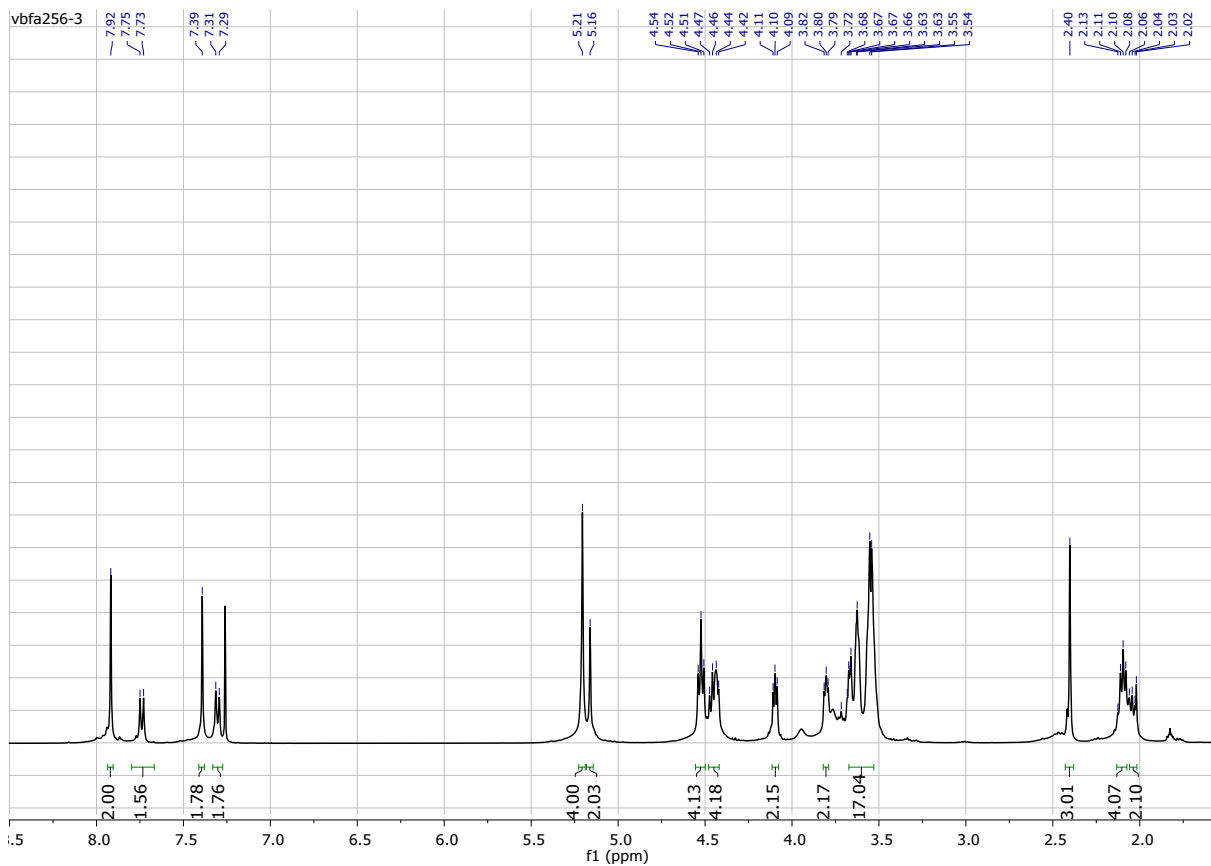

(b)

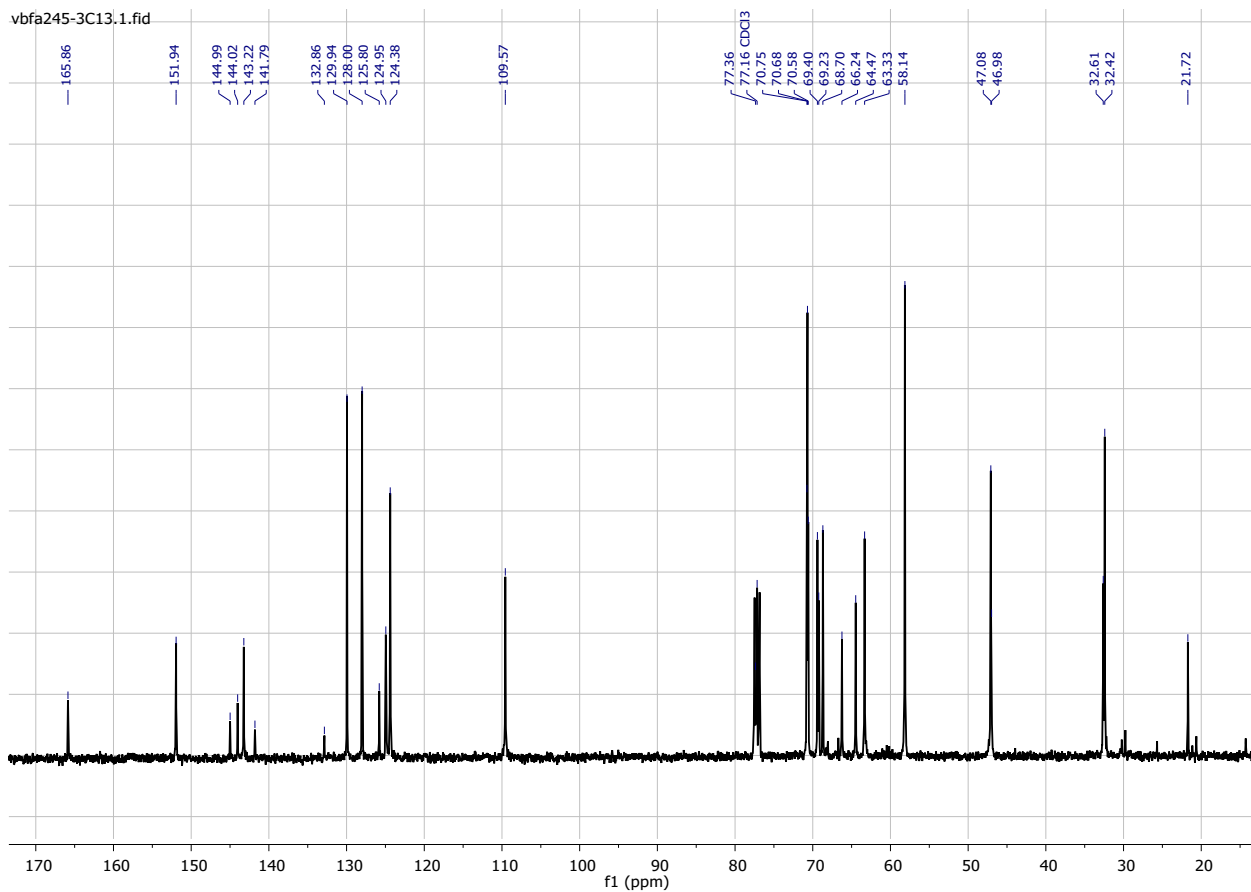

(c)

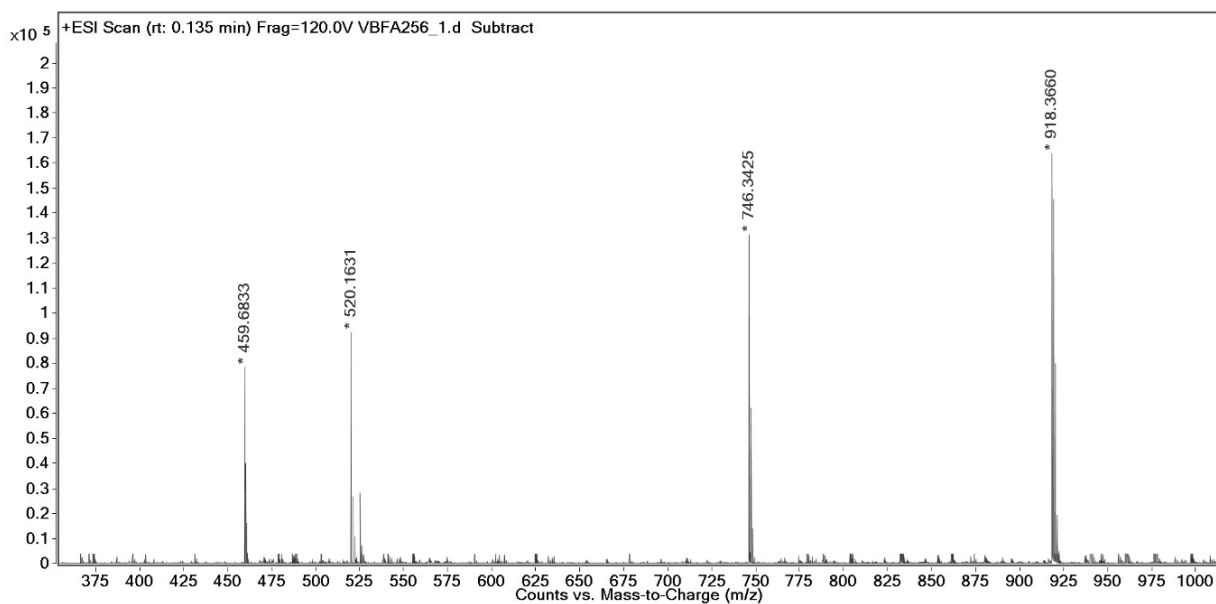

(d)

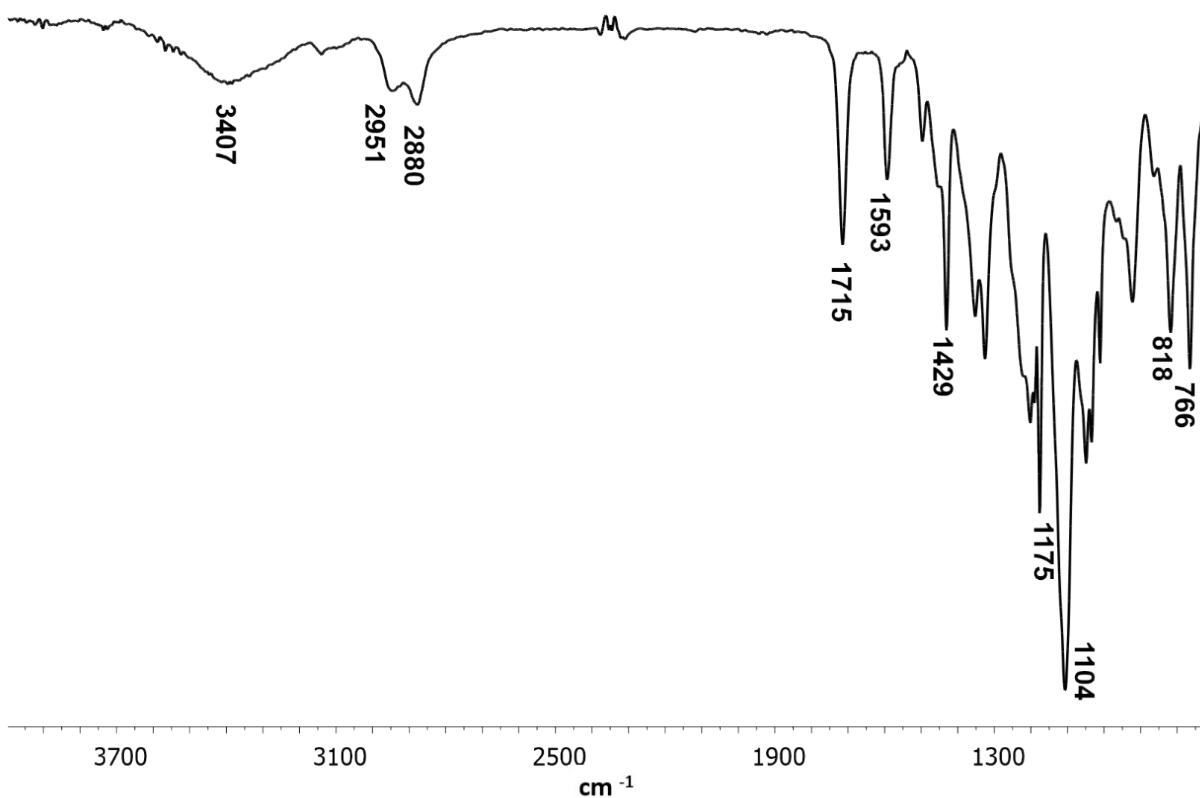

Figure S5. NMR <sup>1</sup>H (a), <sup>13</sup>C (b), and HRESI MS (c), FT IR (d) spectra of *compound (13)*

(a)

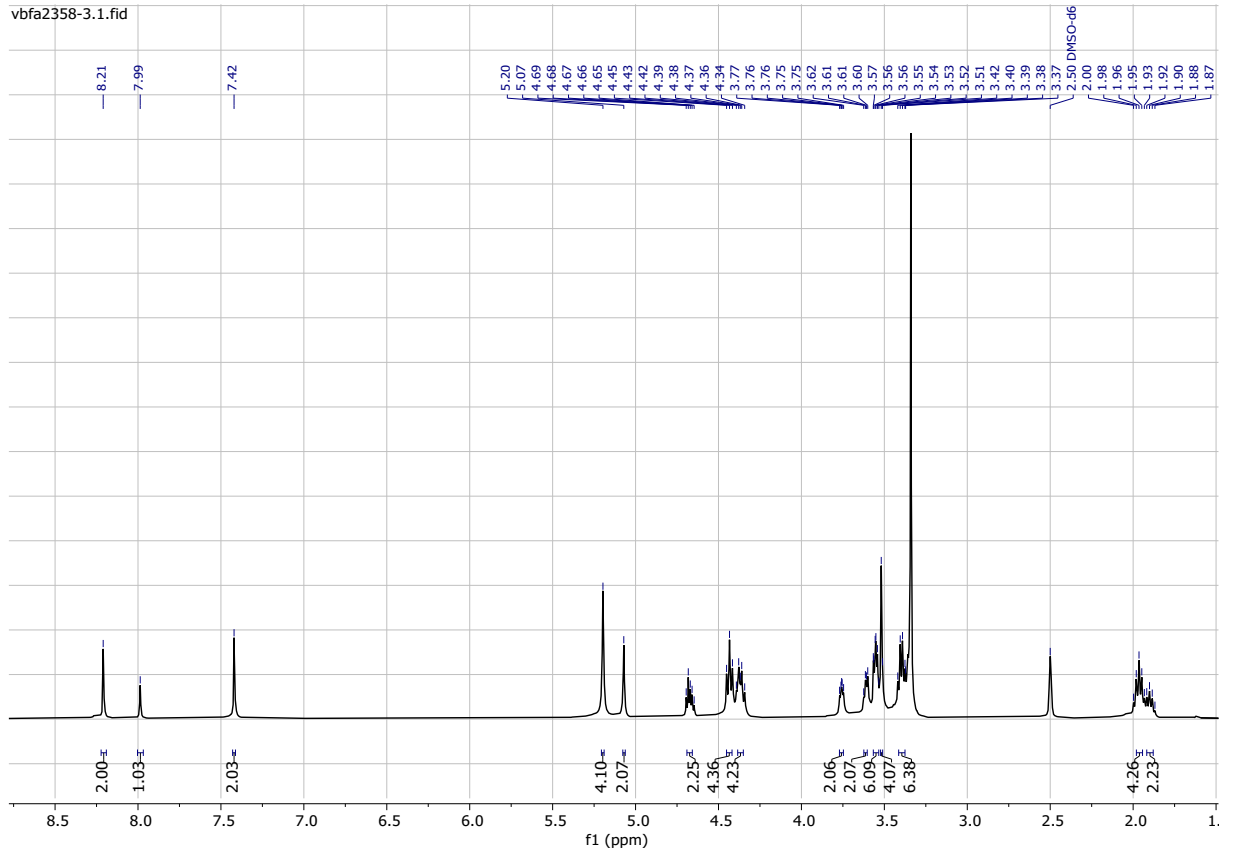

(b)

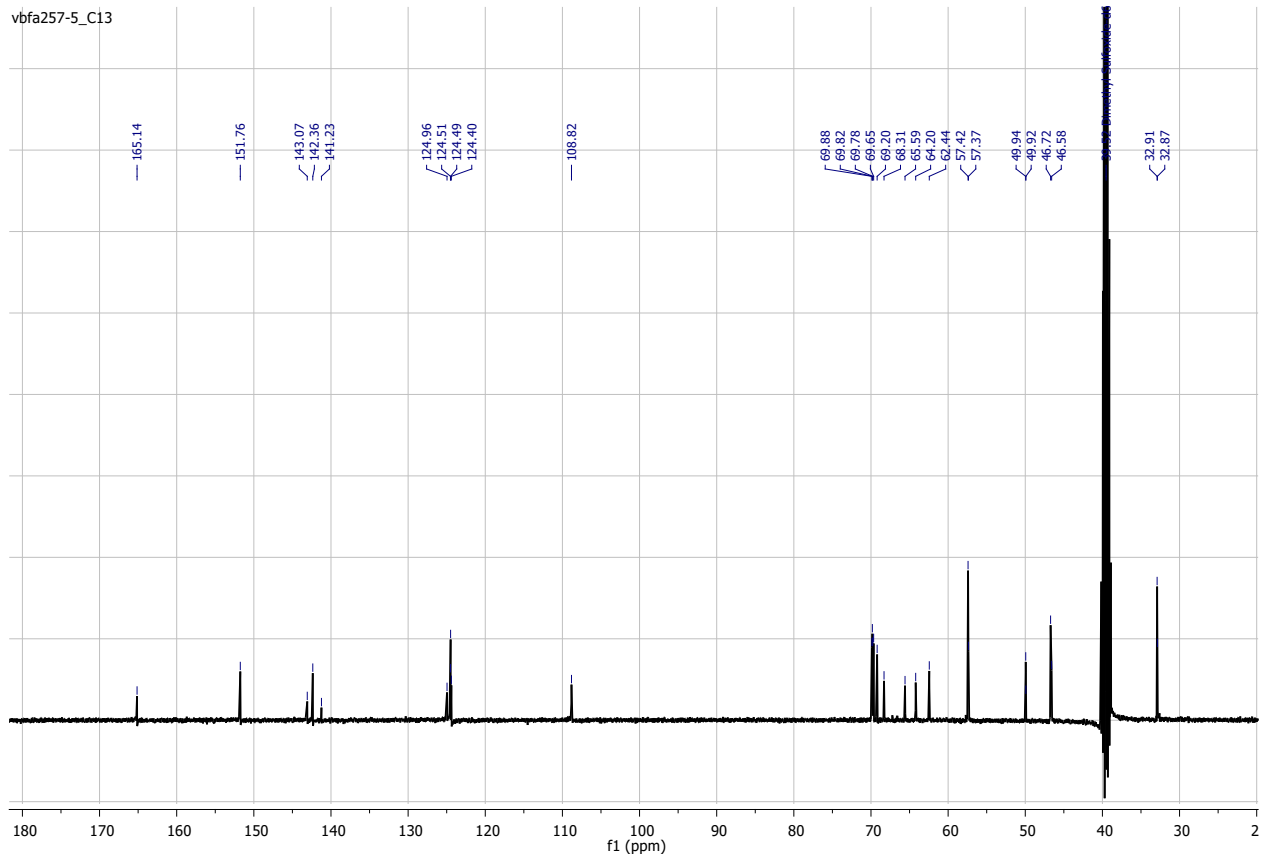

(c)

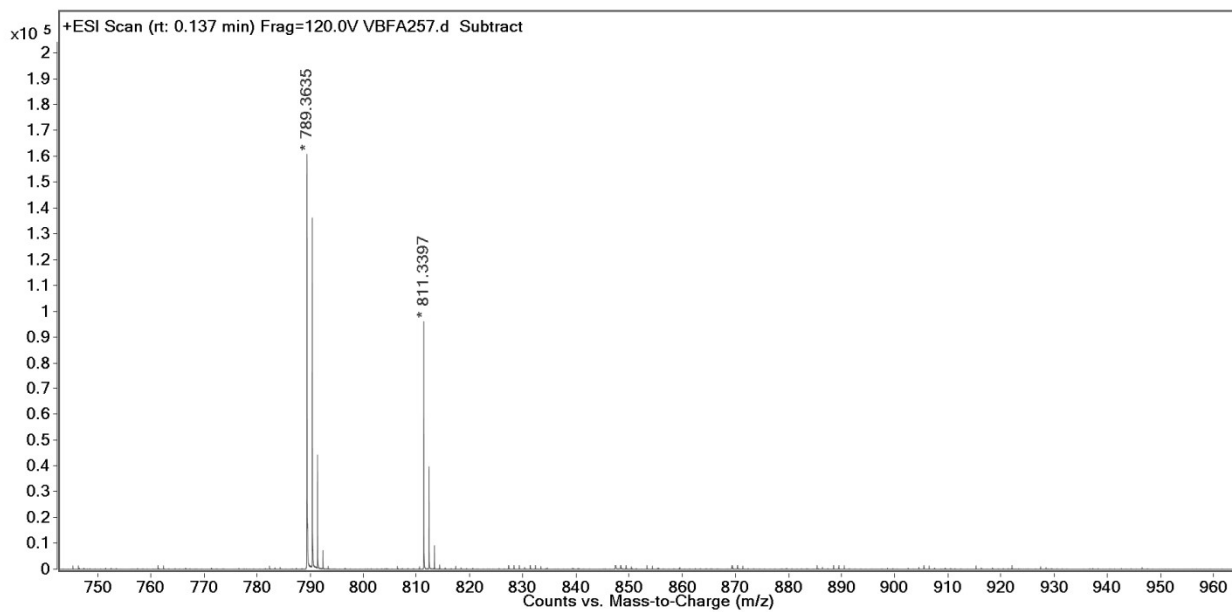

(d)

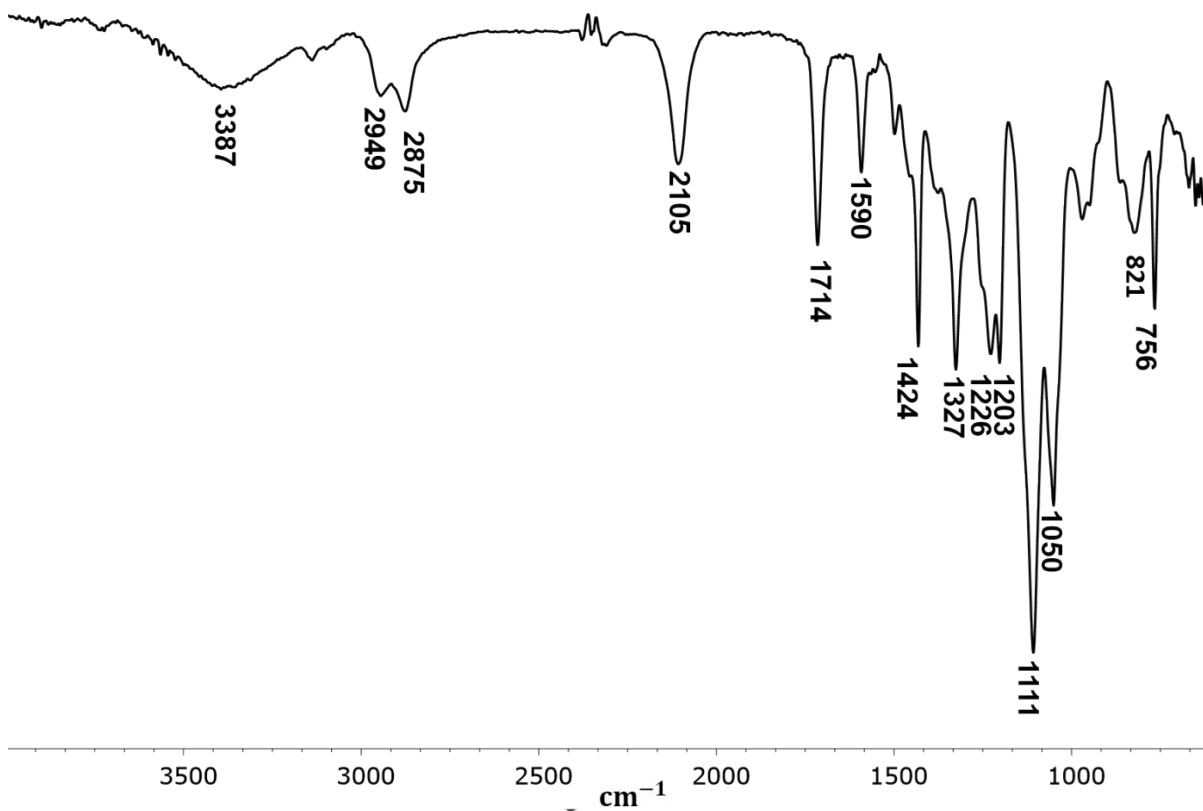

Figure S6. NMR <sup>1</sup>H (a), <sup>13</sup>C (b), and HRESI MS (c), FT IR (d) spectra of *compound (14)*

(a)

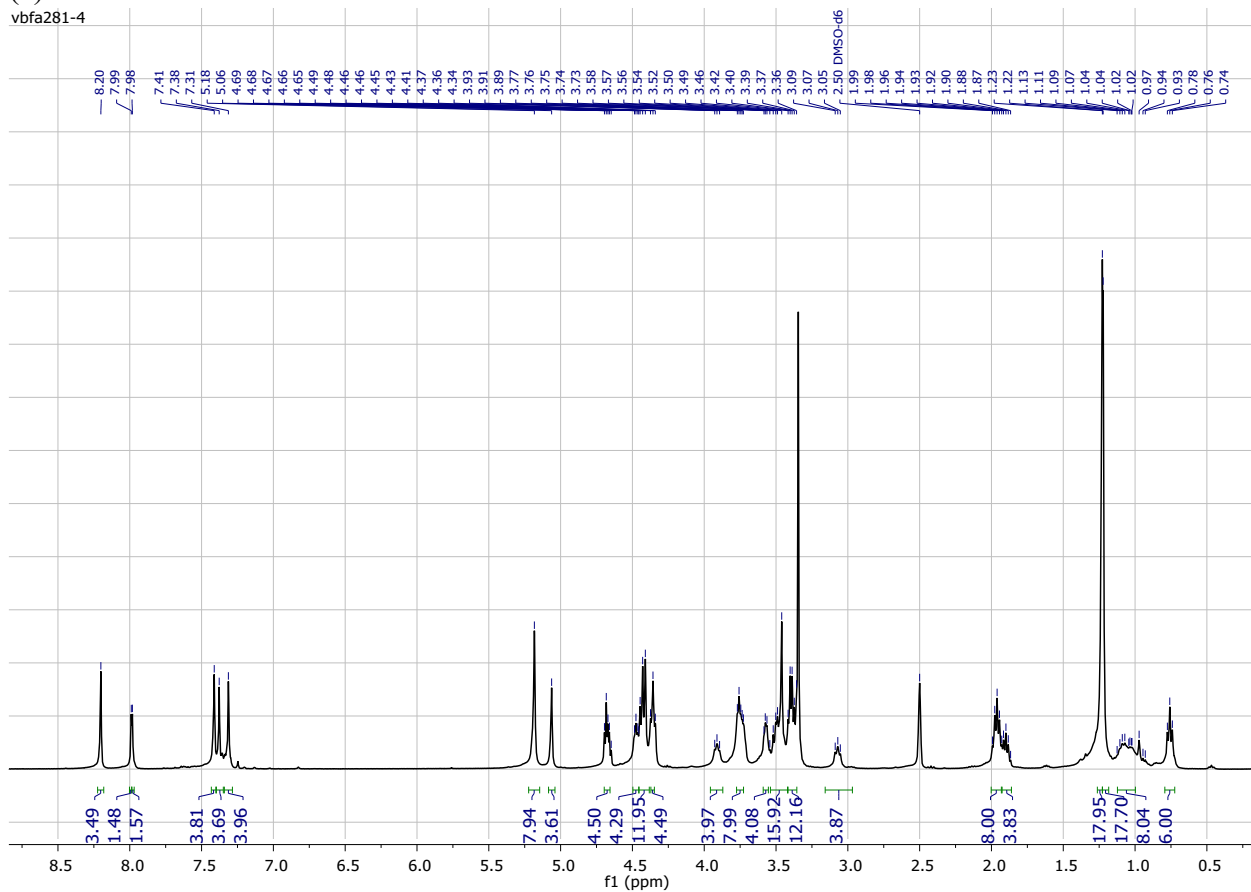

(b)

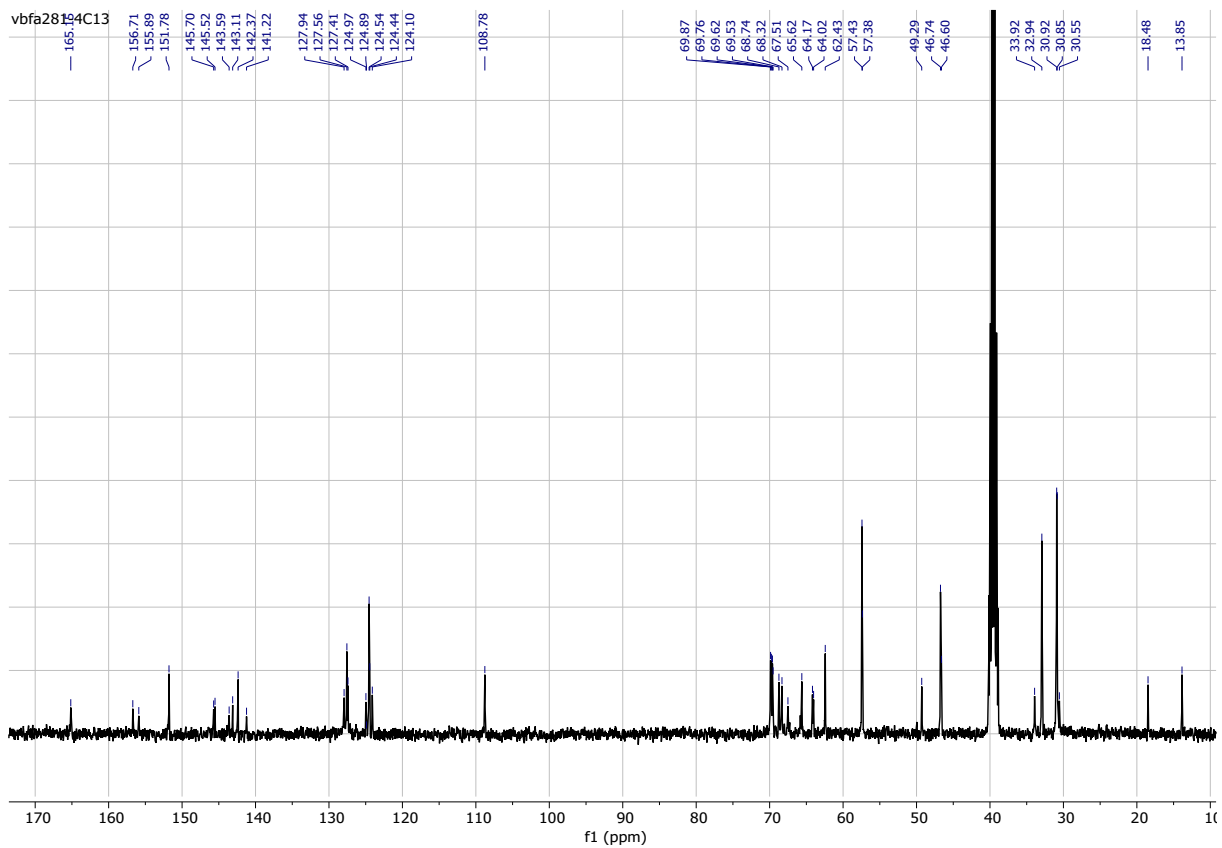

(c)

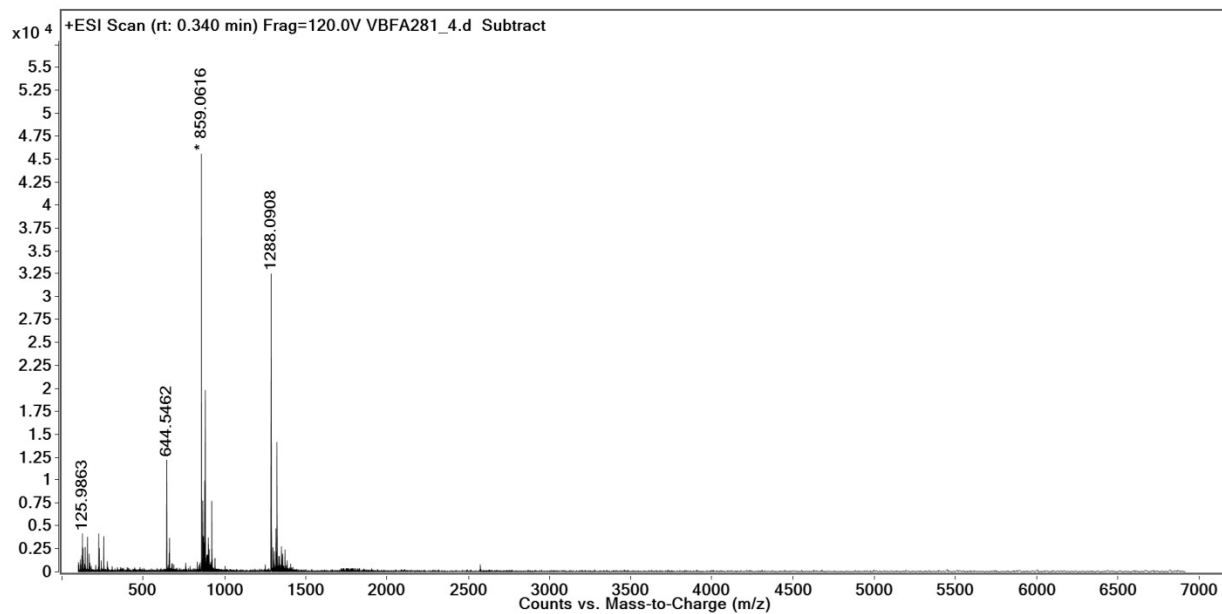

(d)

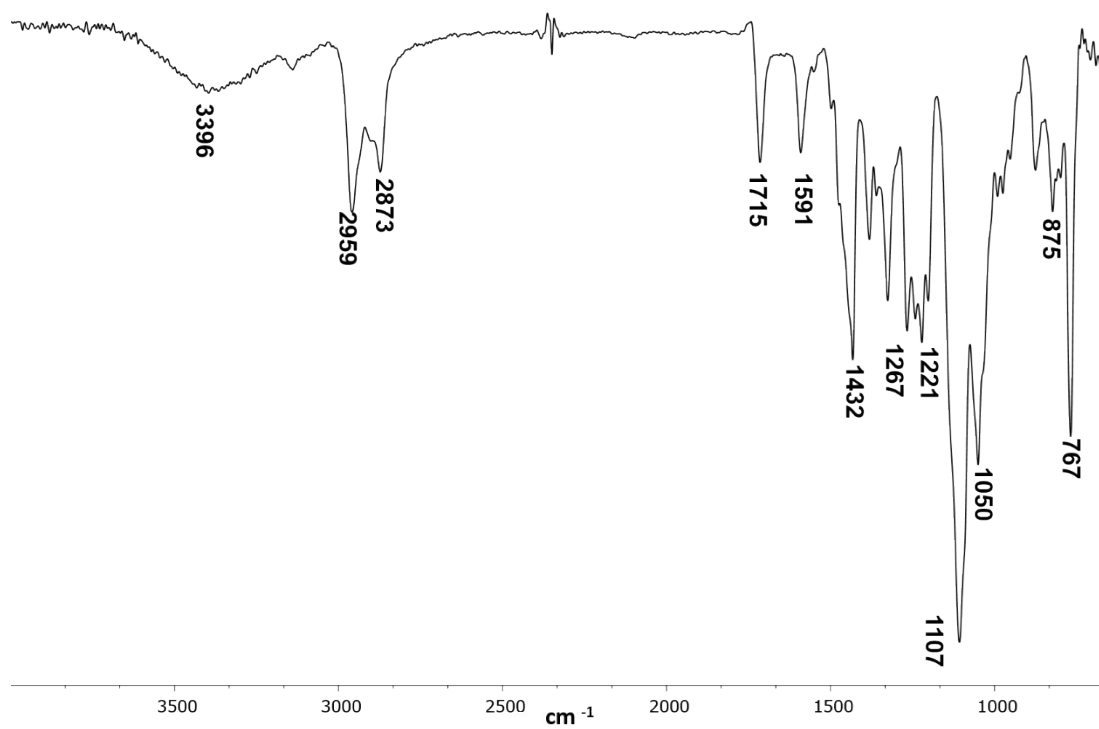

Figure S7. NMR <sup>1</sup>H (a), <sup>13</sup>C (b), and HRESI MS (c), FT IR (d) spectra of *compound (15)*

(a)

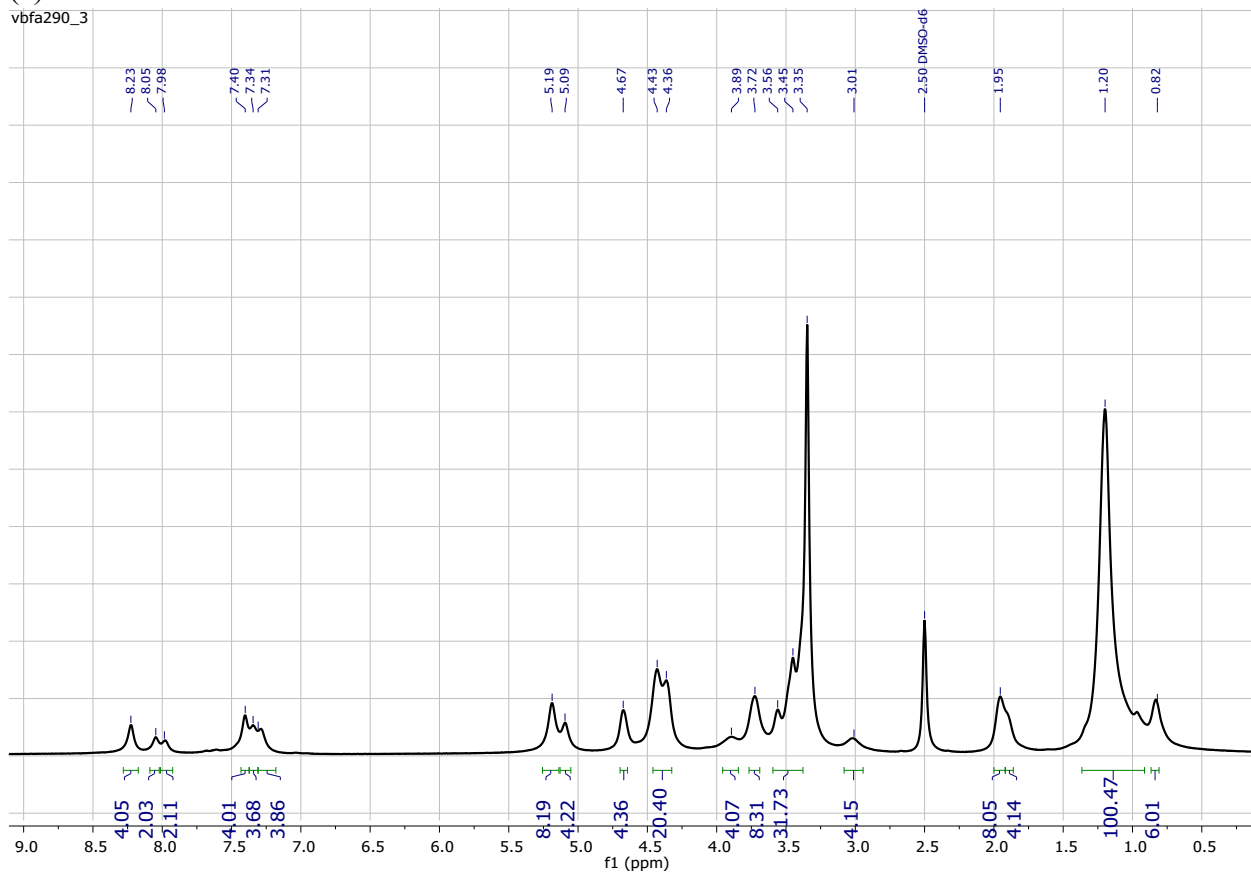

(b)

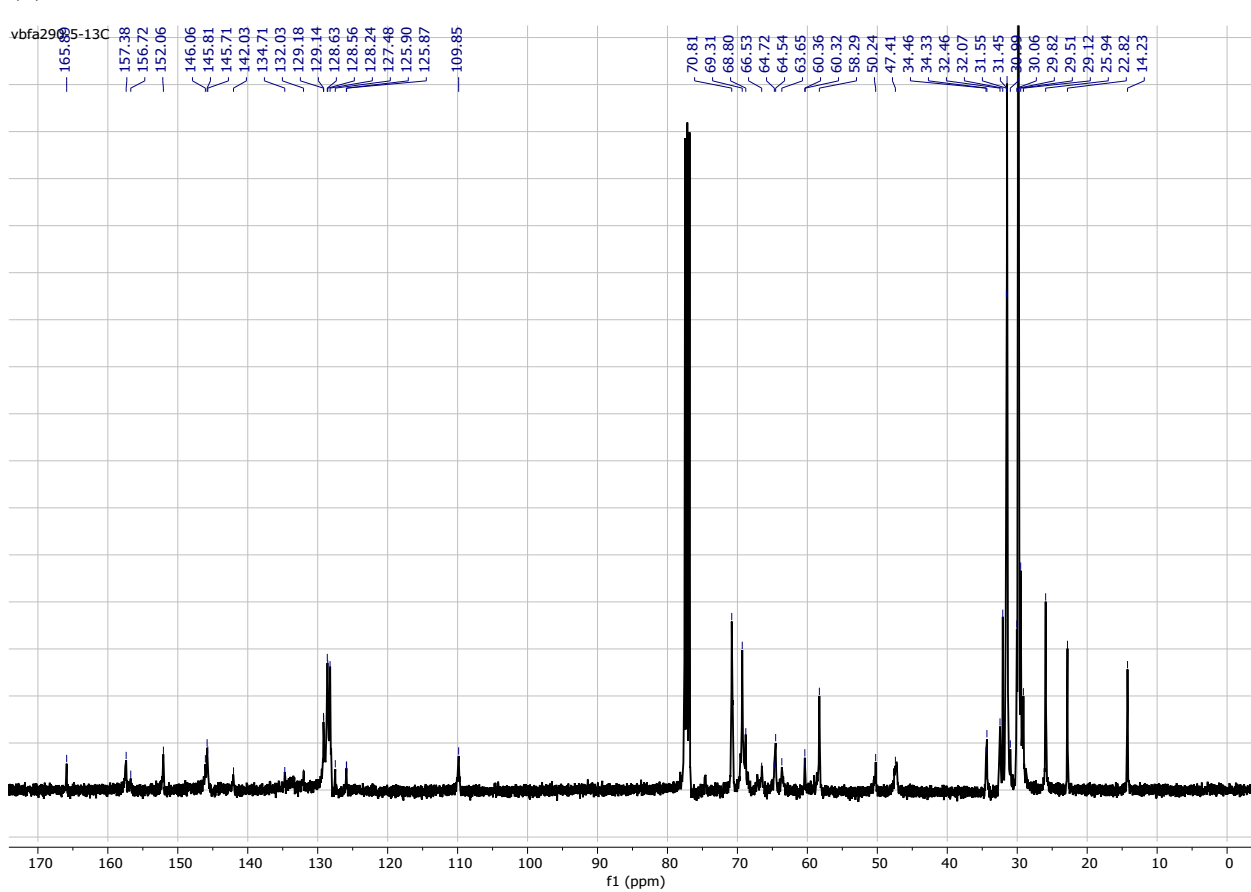



(c)

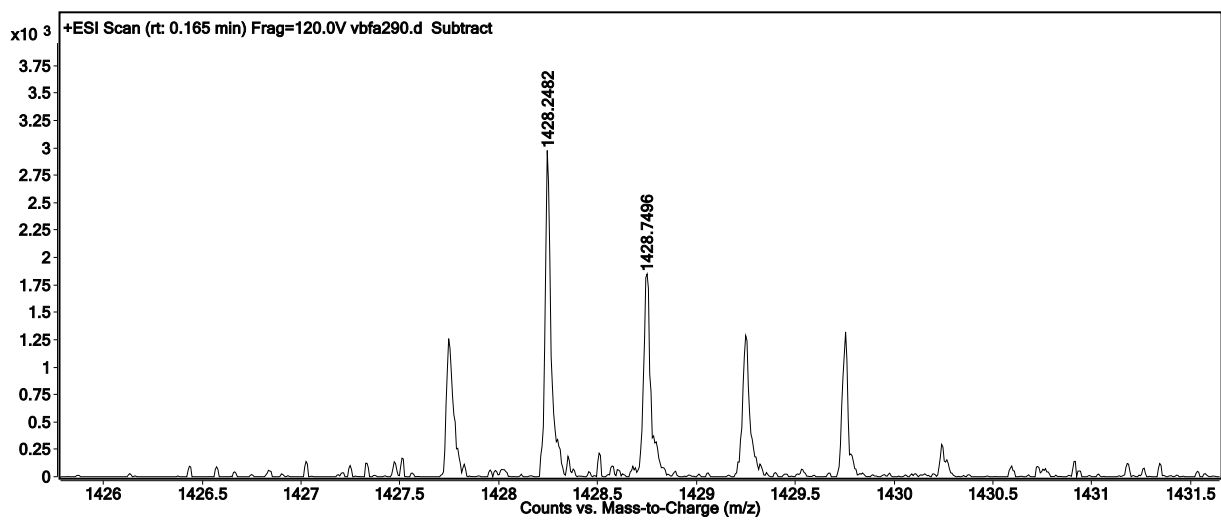

(d)

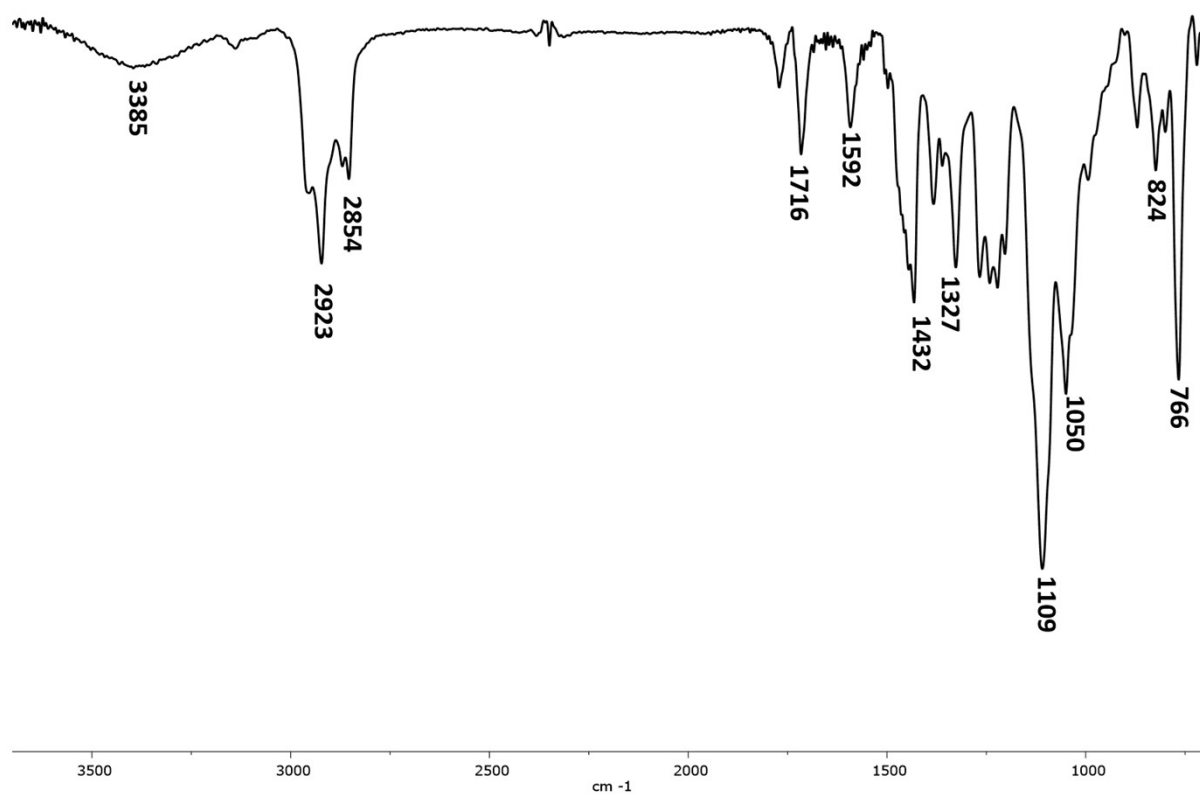

Figure S8. NMR  $^1\text{H}$  (a),  $^{13}\text{C}$  (b), and HRESI MS (c), FT IR (d) spectra of compound (16)

(a)

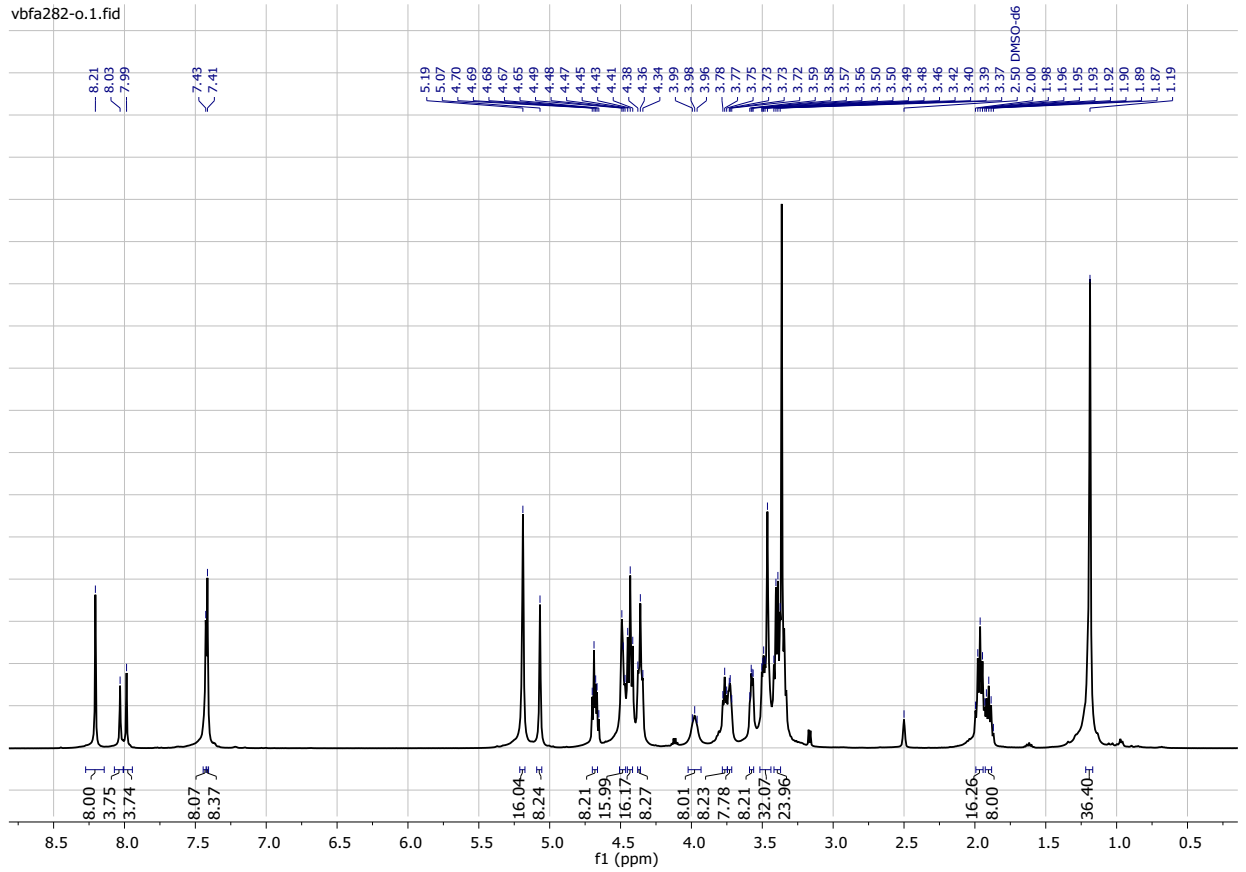

(b)

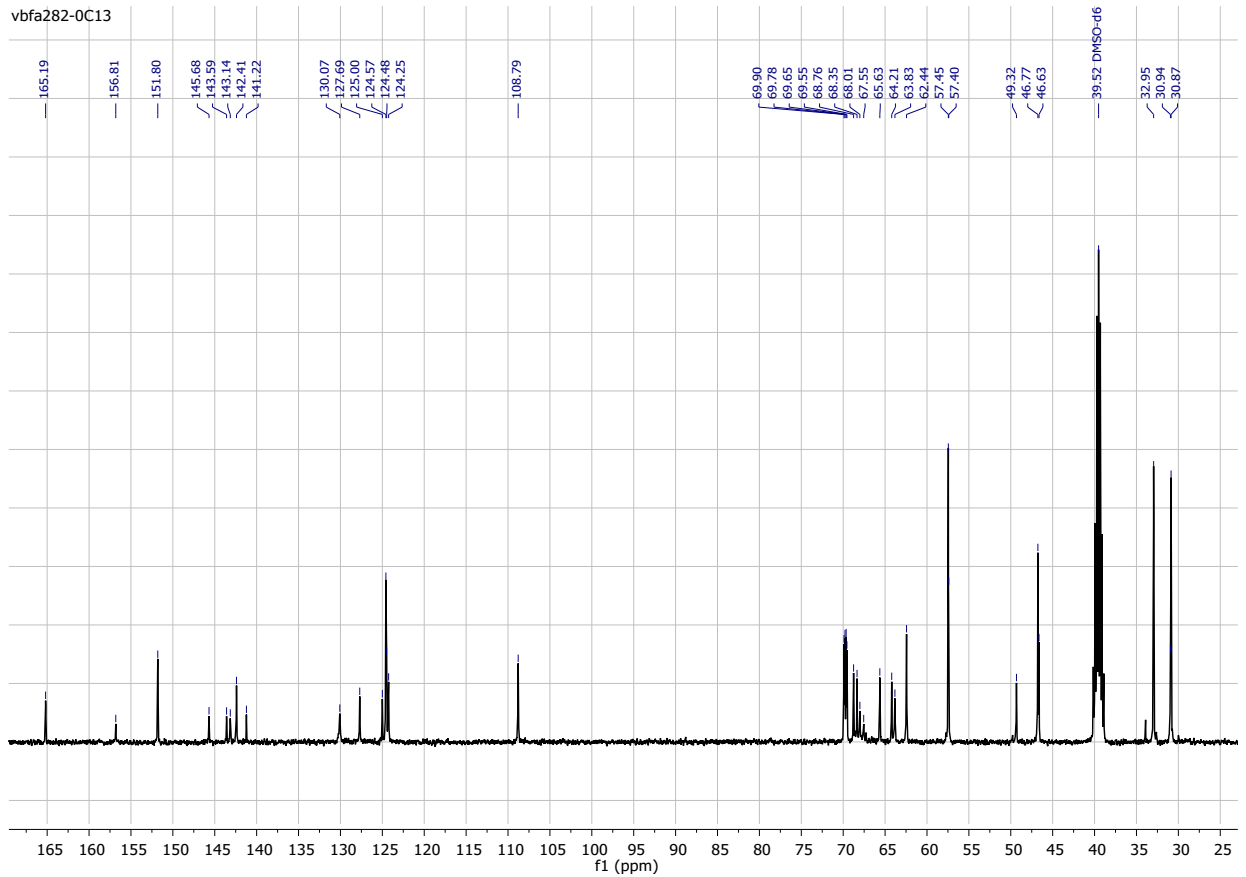

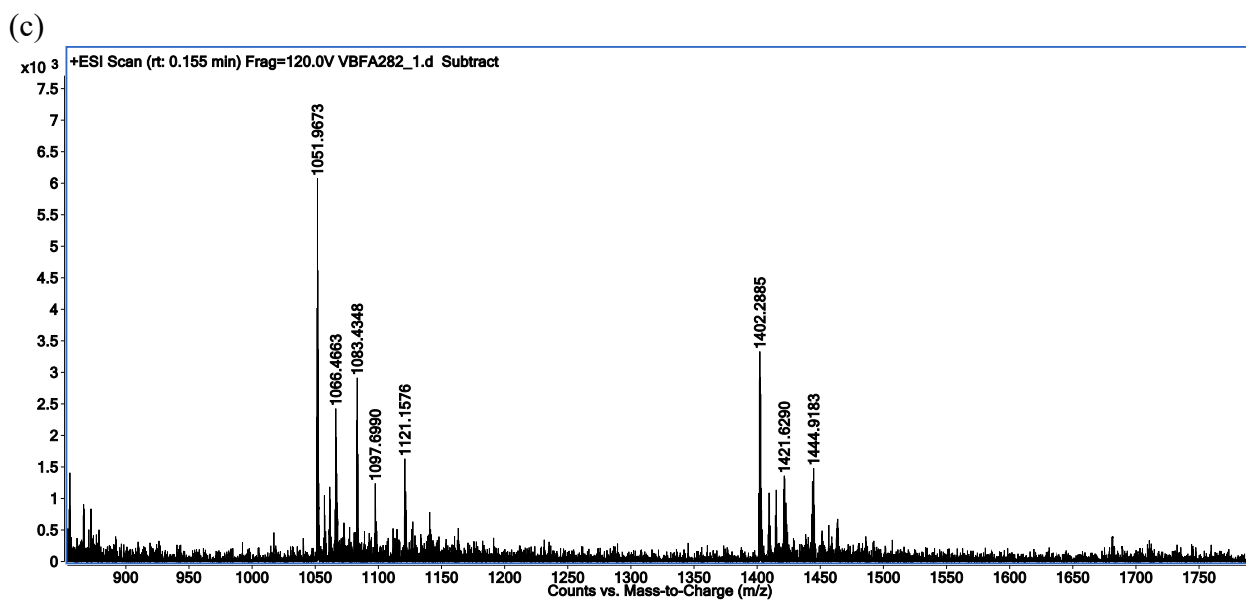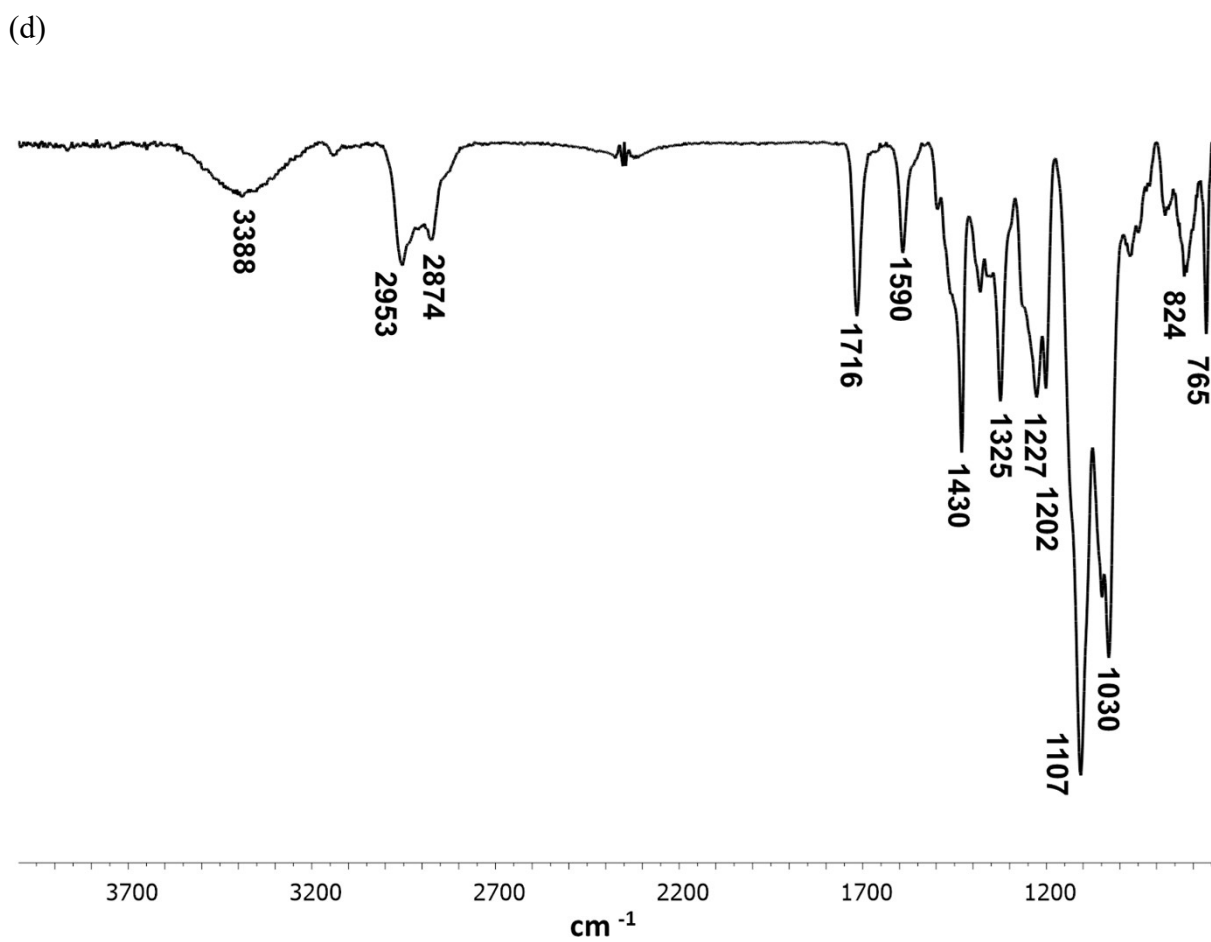

Figure S9. NMR <sup>1</sup>H (a), <sup>13</sup>C (b), and HRESI MS (c), FT IR (d) spectra of *compound (17)*

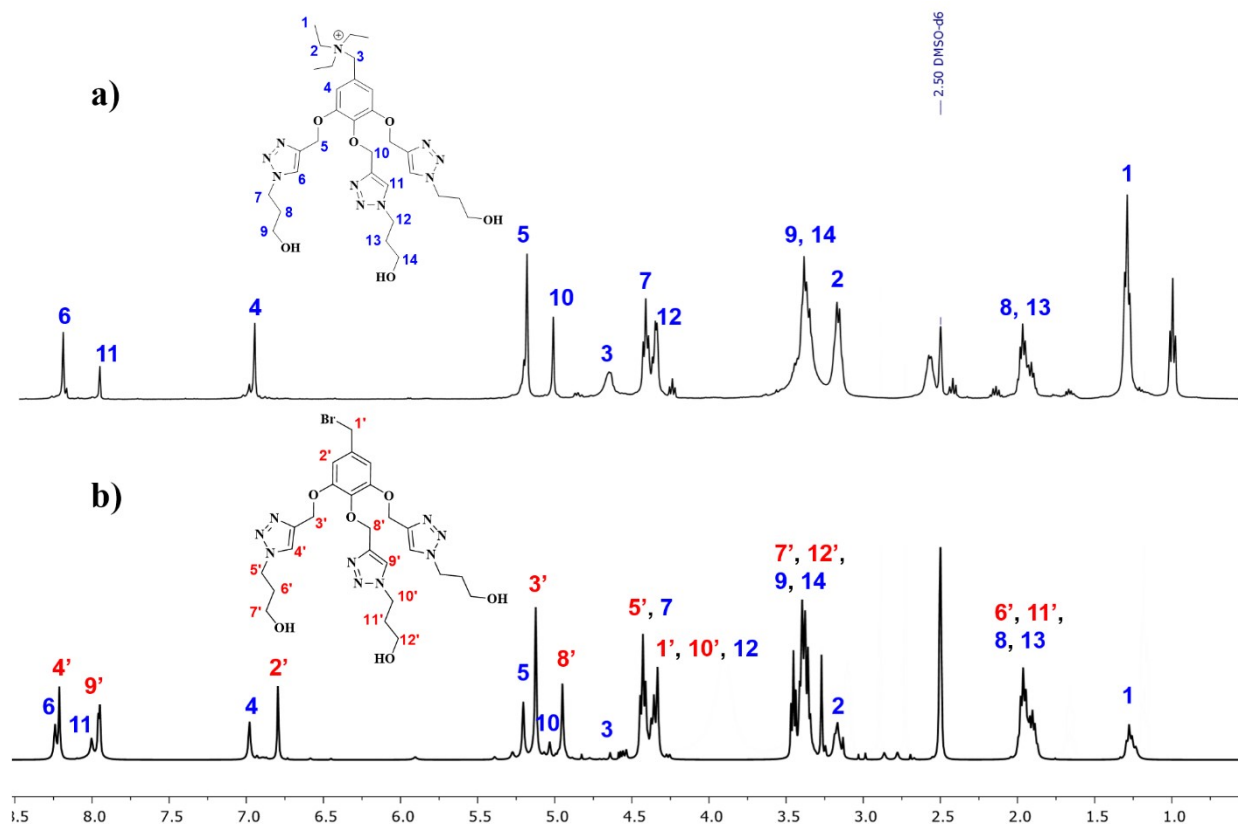

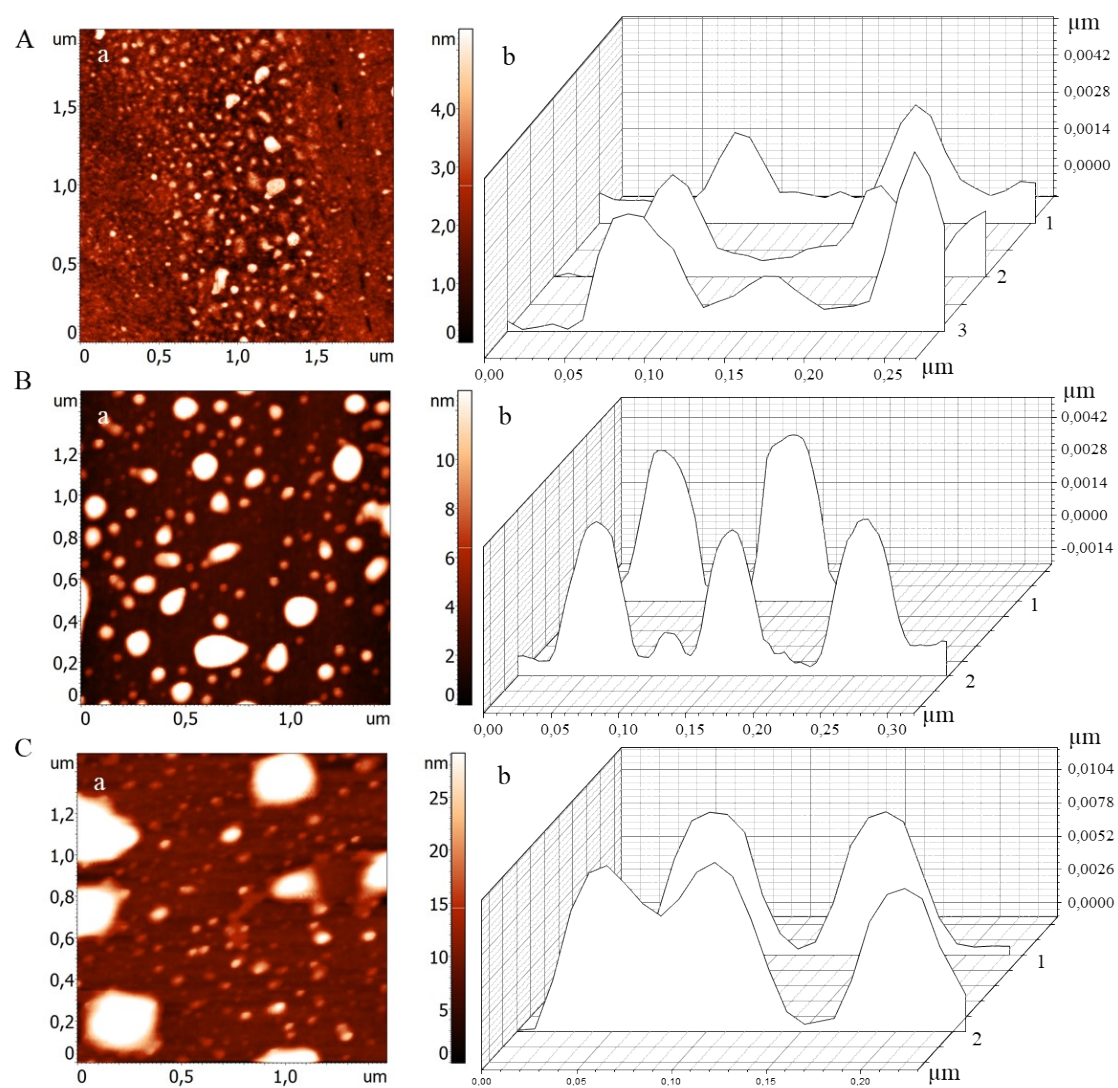

Figure S11 AFM evaluation of the dendrimers: A) **15**, B) **16**, C) **17**, where (a) AFM images and (b) cross-section view of dendrimers showing a diameters and heights;  $C(\text{macrocycles}) = 0.1$  mM in 5% THF – water

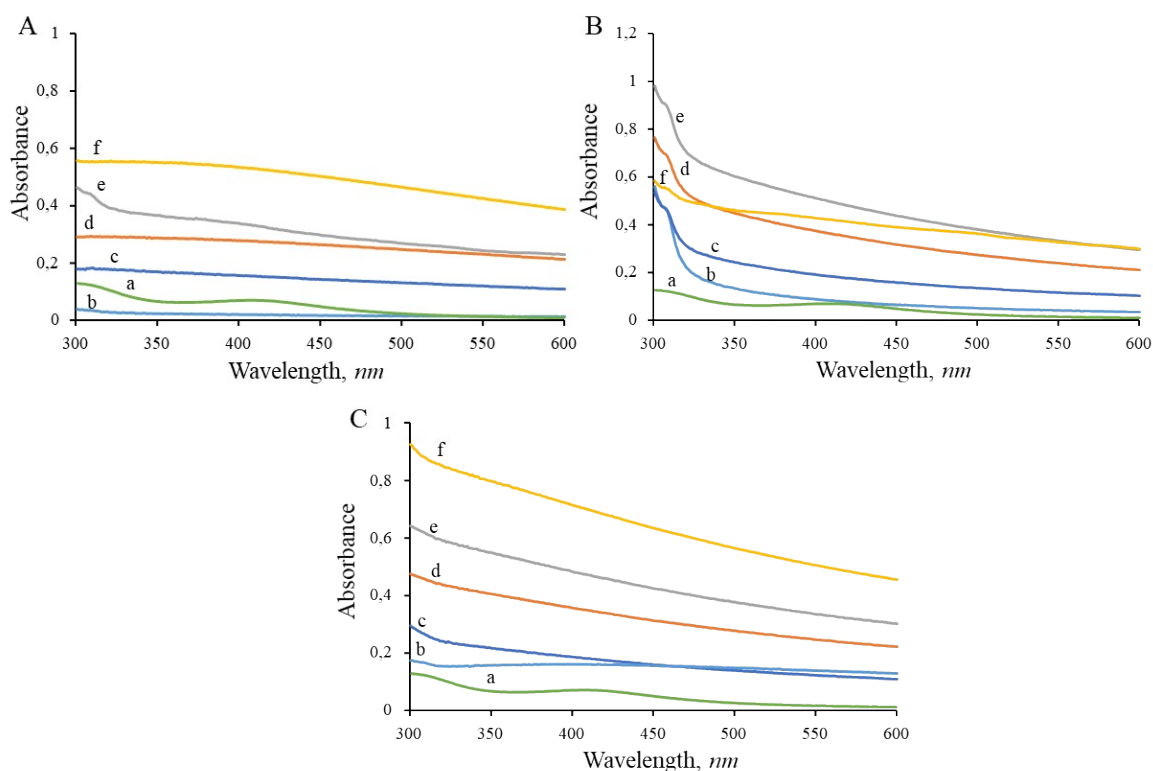

Figure S12 UV-Vis spectra of  $\text{PdCl}_4^{2-}$ , dendrimer and double  $\text{PdCl}_4^{2-}$  -dendrimer systems for A) **15**, B) **16** and C) **17**, where (a)  $\text{PdCl}_4^{2-}$  (0.2 mM), (b) dendrimer (0.1 mM) and dendrimer (0.1 mM) in the presence of different amounts of palladium after reduction during 1 hour (0.1 mM) (c) 0.05mM, (d) 0.1 mM, (e) 0.15 mM, (f) 0.2 mM; water with 5% THF,  $l = 1 \text{ cm}^{-1}$ .

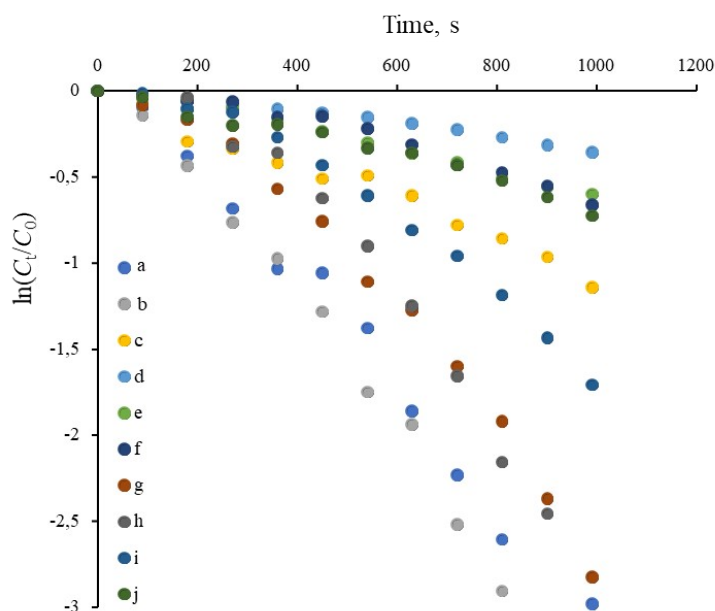

Figure S13 Plots of  $\ln(C_t/C_0)$  vs time in the presence of (a) 0.5Pd&**15**, (b) 1.5Pd&**15**, (c) 2Pd&**15**; (d) 0.5Pd&**17**; (e) 1Pd&**17**; (f) 1.5Pd&**17** (g) 0.5Pd&**16**; (h) 1Pd&**16** (i) 1.5Pd&**16** (j)  $\text{Pd}^0$ ; ( $C(p\text{-nitrophenol}) = 0.1 \text{ mM}$ ,  $C(\text{NaBH}_4) = 5 \text{ mM}$ ,  $n(\text{Pd})$  in metal-dendrimer = 5 nanomole, 5 % THF - water,  $20 \text{ }^\circ\text{C}$ ,  $l = 1 \text{ cm}$ .
